1 **RESEARCH ARTICLE**

2 Céline Bournonville<sup>1,4,5</sup>, Kentaro Mori<sup>1,5</sup>, Paul Deslous<sup>1</sup>, Guillaume Decros<sup>1</sup>, Tim Blomeier<sup>2</sup>,  
3 Jean-Philippe Mauxion<sup>1</sup>, Joana Jorly<sup>1</sup>, Stéphanie Gadin<sup>1</sup>, Cédric Cassan<sup>1</sup>, Mickael Maucourt<sup>1</sup>,  
4 Daniel Just<sup>1</sup>, Cécile Brès<sup>1</sup> Christophe Rothan<sup>1</sup>, Carine Ferrand<sup>1</sup>, Lucie Fernandez-Lochu<sup>1</sup>, Laure  
5 Bataille<sup>1</sup>, Kenji Miura<sup>3</sup>, Laure Beven<sup>1</sup>, Matias Zurbriggen<sup>2</sup>, Pierre Pétriacq<sup>1</sup>, Yves Gibon<sup>1</sup> and  
6 Pierre Baldet<sup>1</sup> \*

7 <sup>1</sup> Univ. Bordeaux, INRAE, UMR1332 Biologie du Fruit et Pathologie, 33883 Villenave d'Ornon,  
8 France.

9 <sup>2</sup> Heinrich-Heine-Universität Düsseldorf, Institute of Synthetic Biology - CEPLAS - Faculty of  
10 Mathematics and Natural Sciences, Dusseldorf Germany.

11 <sup>3</sup> Tsukuba Innovation Plant Research Center, University of Tsukuba, 1-1-1 Tennodai, 305-8577  
12 Ibaraki, Tsukuba, Japan

13 <sup>4</sup> Present address: Monsanto SAS, 1050 Route de Pardies, 40300 Peyrehorade, France

14 <sup>5</sup> C. Bournonville and K. Mori contributed equally to this work

15 (\*) Corresponding author: Pierre Baldet, [pierre.baldet@inrae.fr](mailto:pierre.baldet@inrae.fr)

16

17 **Title:** Blue light promotes ascorbate synthesis by deactivating the PAS/LOV photoreceptor that  
18 inhibits GDP-L-galactose phosphorylase

19

20 **Short Title:** Blue light inactivates a repressor of ascorbate synthesis

21 The author responsible for distributing materials integral to the findings presented in this article  
22 in accordance with the policy described in the Instructions for Authors ([www.plantcell.org](http://www.plantcell.org)) is  
23 Pierre Baldet ([pierre.baldet@inrae.fr](mailto:pierre.baldet@inrae.fr)).

24

25

## 26 **ABSTRACT**

27 Ascorbate (vitamin C) is one of the most essential antioxidants in fresh fruits and  
28 vegetables. To get insights into the regulation of ascorbate metabolism in plants, a mutant  
29 producing ascorbate-enriched fruits was studied. The causal mutation, identified by a mapping-  
30 by-sequencing strategy, corresponded to a knock-out recessive mutation in a new class of  
31 photoreceptor named PAS/LOV protein (PLP, Solyc05g07020), which acts as a negative  
32 regulator of ascorbate biosynthesis in tomato. This trait was confirmed by CRISPR/Cas9 gene  
33 editing, and further found in all plant organs, including fruit that accumulated 2-3 times more  
34 ascorbate than in the WT. The functional characterization revealed that PLP interacted with the  
35 two isoforms of GDP-L-galactose phosphorylase (GGP), known as the controlling step of the L-  
36 galactose pathway of ascorbate synthesis. The interaction with GGP occurred in the cytoplasm  
37 and the nucleus, but was abolished when PLP was mutated. These results were confirmed by an  
38 optogenetic approach using an animal cell system, which additionally demonstrated that blue  
39 light modulated the PLP-GGP interaction. Assays performed *in vitro* with heterologously  
40 expressed GGP and PLP showed that PLP is a non-competitive inhibitor of GGP that is  
41 inactivated after blue light exposure. This discovery sheds light on the light-dependent regulation  
42 of ascorbate metabolism in plants.

## 43 **INTRODUCTION**

44 Ascorbate is an essential metabolite in living organisms. It has a leading role as  
45 antioxidant, by participating in eliminating reactive oxygen species (ROS) that are usually  
46 produced in response to biotic and abiotic stresses (Decros et al., 2019). Ascorbate also plays a  
47 crucial role in controlling the levels of ROS that are continuously produced under optimal  
48 conditions by cell metabolism, in particular photosynthesis. Due to its high antioxidant potential,  
49 ascorbate is one of the most important traits for the nutritional quality of fruits and vegetables.  
50 Indeed, evolution in humans and a few animal species has led to the loss of the L-gulonolactone  
51 oxidase activity, which catalyzes the last steps of the biosynthetic pathway (Burns, 1957).  
52 Consequently, humans are unable to synthesize ascorbate, thus defined as vitamin C, and must  
53 have a daily intake through the consumption of fruits and vegetables. Paradoxically, the  
54 domestication of various fruit species has resulted in decreased ascorbate content (Gest et al.,

55 2013), suggesting the occurrence of a trade-off between fruit yield and quality. Thus,  
56 understanding ascorbate metabolism is a critical issue in plant breeding, particularly for fleshy  
57 fruit species such as tomato, which is considered one of the major sources of vitamin C in the  
58 human diet (Wheeler et al., 1998).

59 The map of plant ascorbate metabolism is well established since the discovery of the  
60 Smirnoff-Wheeler pathway, also called L-galactose pathway, although little is known about the  
61 regulatory mechanisms involved (Wheeler et al., 1998, Bulley and Laing, 2016). The GGP  
62 protein, also known as VTC2 by analogy with *Arabidopsis thaliana*, corresponds to a GDP-L-  
63 galactose phosphorylase (Linster et al., 2008), and is so far considered the controlling enzyme of  
64 the L-galactose pathway (Bulley, 2009; Li et al., 2013; Fenech et al., 2021). It catalyzes the first  
65 step in ascorbate biosynthesis in plants, *i.e.* the conversion of GDP-L-galactose into L-galactose-  
66 1-phosphate. *Arabidopsis* knock-out *vtc2* mutants display a drastic decrease in ascorbate,  
67 although a residual amount is still produced (Dowdle et al., 2007), due to the presence of another  
68 gene encoding a GDP-L-galactose phosphorylase, namely *VTC5*. The *VTC5* gene has a high  
69 sequence homology (~66% identity) with its counterpart *VTC2*, but it was found 100 to 1000  
70 times less expressed. Other studies have hypothesized the existence of additional alternative  
71 pathways (Wheeler et al., 2015). Among them, only the galacturonate and myo-inositol pathways  
72 were considered relevant. However, these alternative routes have not been completely  
73 demonstrated, and some results tend to invalidate these assumptions. Indeed, the *Arabidopsis*  
74 *vtc2/vtc5* double mutant is unable to grow without the addition of exogenous ascorbate (Dowdle  
75 et al., 2007). This suggests that there would be no other way than the L-galactose pathway to  
76 complement ascorbate deficiency. Among the enzymes involved in ascorbate synthesis, VTC2 is  
77 the only one to have a significant effect on ascorbate levels when overexpressed, although GDP-  
78 D-mannose 3',5'-epimerase acts synergistically with it to increase ascorbate in leaves (Bulley et  
79 al., 2009). Precise information on the regulation of VTC2 is lacking, with the exception of the  
80 activity of an uORF (upstream Open Reading Frame) in the 5'-UTR of the *VTC2* gene, which  
81 was found to control the level of translation of the VTC2 protein (Laing et al., 2015).  
82 Interestingly, in the presence of high ascorbate concentration, the VTC2 protein was shown to be  
83 downregulated (Laing, 2015). This is to be linked to the fact that excess ascorbate can have  
84 deleterious effects, in particular male sterility (Deslous et al., 2021). At the cellular level, a  
85 fluorescent fusion protein approach emphasized that the VTC2 protein is localized in both

86 cytoplasmic and nuclear compartments (Müller-Moulé, 2008). This unexpected nuclear  
87 localization for a metabolic enzyme suggests that GGP might also act as a dual-function protein:  
88 a regulatory factor as well as a catalytic enzyme.

89 Ascorbate levels are highly dependent on environmental conditions, *e.g.* salt stress,  
90 drought and, in particular, intense light that induces ascorbate accumulation. The existence of  
91 regulators has been recently demonstrated with the discovery of a few proteins acting at the  
92 transcriptional or post-transcriptional level on the regulation of specific genes and enzymes of the  
93 L-galactose pathway. These studies, mainly carried out in Arabidopsis leaf, identified AMR1,  
94 ERF98 and CNS5B proteins as positive or negative regulators. However, for some of these  
95 effectors, the underlying mechanisms remain to be depicted (Zhang and Huang, 2010; Zhang et  
96 al., 2012; Alimohammadi et al., 2012). Regarding the effect of light on plant development,  
97 previous works showed that light might directly or indirectly affect the expression of genes of the  
98 L-galactose pathway. For instance, darkness in Arabidopsis induced the degradation of GDP-  
99 mannose pyrophosphorylase (VTC1) by the CSN5B-Cop9 complex associated with the  
100 proteasome (Wang et al., 2013). Moreover, the AMR1/SCF complex has been shown to modulate  
101 the expression of all genes of the L-galactose pathway through an unknown mechanism (Zhang et  
102 al., 2009). Interestingly, prolonged exposure to light increases the expression of the *GGP* gene  
103 (Dowdle et al., 2007). Additionally, some studies have shown that the *GGP* gene is under  
104 circadian control (Tabata et al., 2002; Dowdle et al., 2007; Müller-Moulé, 2008). All these  
105 studies demonstrate an apparent link between ascorbate metabolism and light signalling, but to  
106 date there is no evidence that light directly induces ascorbate biosynthesis or that overexpression  
107 or activation of the GGP enzyme is the consequence of oxidative stress related to light exposure.

108 It is well-established that there is a positive correlation between light intensity and  
109 ascorbate levels in photosynthetic tissues (Gautier et al., 2008; and Bartoli et al., 2009). In  
110 tomato, light was also found to impact ascorbate content more in the leaves than in fruit (Massot  
111 et al., 2012). Furthermore, Gautier et al., (2009) showed that fruit ascorbate content was not  
112 limited by leaf photosynthesis but was dependent on direct fruit irradiance. Surprisingly, the  
113 literature is poor regarding the molecular mechanisms relating ascorbate and light sensing. The  
114 photoreceptor proteins that collect a light signal *via* the absorption of a photon to drive and  
115 govern biological activity are classified according to the wavelength and physiological processes  
116 involved. Among these, phytochromes (red and far-red) and UVR8 (UVB) play a crucial role in

117 plant development and UV protection. The largest family includes the blue light photoreceptors,  
118 which are involved in the circadian clock and phototropism through protein and gene expression  
119 modifications (Christie, 2007). These blue light sensors are all flavoproteins, thus requiring a  
120 flavin (FMN or FAD) cofactor domain in addition to the effector domain. Most of them are well  
121 characterized, such as the phototropins and the proteins involved in the circadian clock (Briggs,  
122 2001; Christie et al., 2002; Crosson et al., 2003). Recent reviews mentioned another type of  
123 photoreceptor protein containing a unique LOV (Light Oxygen Voltage) domain, named  
124 PAS/LOV Protein (PLP), and for which the biological function remains to be established. It has  
125 been demonstrated that the LOV domain of these photoreceptor proteins can change  
126 conformation when exposed to blue light and that this modification is reversible in the absence of  
127 blue light signal (Kasahara 2010). Recently, Li and co-workers (2018) showed that the expression  
128 of PLP can also be triggered in soybean plants cultured under darkness or red light. Interestingly,  
129 a yeast two-hybrid screening performed with a cDNA bank from Arabidopsis leaf allowed the  
130 identification of AtGGP1 (VTC2) and AtGGP2 (VTC5) as being potential PLP-interacting  
131 proteins (Ogura et al., 2008). In their study carried out in soybean, Li and co-workers observed  
132 some phenotypic alterations in the *Gmplp* mutants, especially hypocotyl growth. Nevertheless, no  
133 hypothesis was proposed to explain the putative function of the PLP protein in relation to such  
134 developmental processes (Li et al., 2018).

135 A population of EMS mutants obtained in the miniature Micro-Tom tomato cultivar was  
136 recently shown to exhibit a genetic and phenotypic variability far beyond the natural variation  
137 found in domesticated species (Just et al., 2013; Garcia et al., 2016). In a forward genetic  
138 strategy, this population proved valuable to screen for traits of interest (Garcia et al., 2016),  
139 including increased ascorbate (Deslous et al., 2021). The present study found a mutation causing  
140 a build-up in fruit ascorbate content and validated it within the gene encoding PLP. The  
141 interaction of PLP and GGP was confirmed *in vivo* and established *in vitro*, revealing that PLP  
142 inhibited GGP and that light promoted ascorbate synthesis by counteracting this inhibition.

## 143 **RESULTS**

### 144 **Detection of ascorbate-enriched mutants in an EMS Micro-Tom Tomato population.**

145 A forward genetic approach was performed to discover new regulators of ascorbate  
146 metabolism in plants. In that aim, the EMS (Ethyl Methanesulfonate) mutant collection generated  
147 in the Micro-Tom Tomato cultivar at INRAE Bordeaux (Just et al., 2013) was screened to find  
148 mutants producing ascorbate-enriched (also called AsA+) fruits (Deslous et al., 2021). A total of  
149 500 M2 and M3 mutant families were cultivated in the greenhouse, in batches of 100 families  
150 representing a total of 6,000 plants screened. On each plant, at least 4 fruits at the red ripe stage  
151 were pooled and assayed for ascorbate content. The range of ascorbate content found in the  
152 mutants varied from 0.5 to 4  $\mu\text{mol}\mu\text{mol.g}^{-1}$  FW (Suppl. Fig.1A), whereas the WT mean values  
153 ranged from 1 to 1.3  $\mu\text{mol}\mu\text{mol.g}^{-1}$  FW depending on the period of the year. Although low, such  
154 variations in ascorbate content were expected in the WT, as it is well known that ascorbate  
155 content is regulated by environmental factors such as light irradiance (Gatzek et al., 2002;  
156 Gautier et al., 2008; Bartoli et al., 2009).

157 An ascorbate threshold value for selecting ascorbate-enriched mutants was set at 2  
158  $\mu\text{mol}\mu\text{mol.g}^{-1}$  FW *i.e.* around twice the value of the WT, resulting in the selection of 93 families  
159 (193 plants in total). Selected plants were cut to allow new growth, then used in a second  
160 screening for confirmation of the “AsA+” phenotype. Following this second screening, 5 families  
161 with an ascorbate fruit content 3 to 5 times higher than that of WT were selected. (Suppl. Fig 1B).  
162 We present here the characterization of one of these mutants, named P21H6. For this family, only  
163 one plant over 12 sown displayed the ascorbate-enriched phenotype. Interestingly, ascorbate  
164 content was 2.5  $\mu\text{mol}\mu\text{mol.g}^{-1}$  FW at the first screening performed at the end of autumn, whereas  
165 after the confirmation performed during the following spring season, the ascorbate content  
166 increased to up to 4  $\mu\text{mol.g}^{-1}$  FW, thus suggesting an impact of the season on ascorbate pools.  
167 The P21H6 mutant was chosen as there was no apparent alteration in the phenotype of the  
168 vegetative and reproductive organs (Suppl. Fig.1B).

### 169 **Identification of the causal mutation of the ascorbate-enriched P21H6 mutant.**

170 In order to identify the mutated locus responsible for the ascorbate-enriched phenotype,  
171 the genetic inheritance features of the mutation were first determined using classical Mendelian  
172 genetics. For this, the ascorbate-enriched phenotype was analyzed in the progeny after self-  
173 pollination (S1). For 12 S1 plants, all produced ascorbate-enriched fruits, whereas fruits from all  
174 plants of the backcross (BC<sub>1</sub>F<sub>1</sub>) displayed a WT-like ascorbate content phenotype (Suppl.

175 Fig.2A). The resulting BC<sub>1</sub>F<sub>2</sub> segregating population consisting of 441 individuals was then  
176 analyzed for the ascorbate-enriched phenotype (Suppl. Fig. 2B). The analysis showed that 115  
177 plants were defined as “AsA+” and 326 as ‘WT-like’, thus confirming a Mendelian 1:2:1  
178 segregation, involving a single recessive mutation.

179 For the identification of the causal mutation, a mapping-by-sequencing strategy was used  
180 (Garcia et al., 2016). From the BC<sub>1</sub>F<sub>2</sub> population, two bulked pools of 44 individual plants  
181 displaying either AsA+ or WT-like fruit phenotypes were generated (Suppl. Fig.2B). Pooled  
182 genomic DNA from each bulk was then sequenced to a tomato genome coverage depth of 39X,  
183 the trimmed sequences were mapped onto the tomato reference genome, and EMS mutation  
184 variants were filtered to exclude natural polymorphisms found in cv Micro-Tom (Kobayashi et  
185 al., 2014) compared with the cv Heinz 1706 reference genome (Suppl. Table 1 and 2). Analysis  
186 of the allelic frequencies (AF) of variants in the two bulks led to the identification of  
187 chromosome 5 as the genome region carrying the causal mutation since it displayed high mutant  
188 AFs (AF > 0.95) in the AsA+ bulk and much lower frequencies (AF < 0.4) in the wild-type-like  
189 bulk (Fig.1A). Analysis of the putative effects of the mutations on protein functionality  
190 highlighted 2 genes carrying mutations in exons. Among these, one affected an “unknown  
191 protein”, while the second affected a predicted PLP (Solyc05g007020) that was located at the top  
192 of the SNPs plot according to AF analysis. Given that a link between PLP and the enzyme GGP  
193 had previously been found (Ogura et al., 2008), we considered PLP to be the most likely  
194 candidate. Unequivocally, to associate the *plp* mutation with the ascorbate-enriched trait, and to  
195 exclude any other mutated locus, recombinant plants selected from the BC<sub>1</sub>F<sub>2</sub> progeny were used  
196 (Fig.1B). To this end, we used the EMS-induced SNPs surrounding the *PLP* gene as genetic  
197 markers. It clearly indicated that a single G to A nucleotide transversion occurred in the fifth  
198 exon corresponding to the LOV domain of PLP (Fig.1C), resulting in the knocking-out of the  
199 protein due to the appearance of a STOP codon instead of a glutamine codon.

200 The functional validation of PLP as a negative regulator of ascorbate biosynthesis was  
201 next performed by generating *plp* mutants in the WT using Clustered regularly interspaced short  
202 palindromic repeat (CRISPR)/CRISPR-associated protein 9 (Cas9). Within the large family of  
203 photoreceptor proteins harboring a LOV domain, the latter has a very high level of sequence  
204 homology. Consequently, the PAS domain was targeted to produce KO mutations in the 5’  
205 terminal region of the *PLP* gene (Fig.2A). Several T0 lines were generated, and mature fruits

206 were analyzed for ascorbate content. Five T0 lines displaying at least a 2-fold increase in  
207 ascorbate were selected to produce the next T1 generation (Suppl. Table 3). The sequencing of  
208 the *PLP* gene for several T1 plants of lines 6, 15, 17 and 21 revealed various deletions that  
209 represented 1 to 8 nucleotides (Suppl. Fig.3). All of these deletions resulted in a shift of the open  
210 reading frame and the appearance of a STOP codon in the downstream coding sequence of the  
211 *PLP* gene. For further studies, homozygous T2 plants of lines 15-1 and 15-5 were used  
212 indifferently as they harbored the same mutation (Fig. 2B; Suppl. Fig. 3). Moreover, a tomato  
213 genome investigation revealed the presence of a PLP-like protein (Solyc01g010480) displaying  
214 65% peptide identity mainly distributed in the PAS and LOV domains characteristic of the  
215 phototropin proteins. Sequencing analysis showed that this PLP-like protein was not off-targeted  
216 by the chosen CRISPR/Cas9 strategy.

### 217 **PAS/LOV is a repressor of ascorbate accumulation in tomato plants**

218 As mentioned above, no noticeable morphological and physiological change was observed  
219 at the whole plant level in the mutant compared to the WT. To characterize the consequences of  
220 the knocking-out of the *PLP* gene on ascorbate metabolism, ascorbate assays were carried out  
221 during fruit development as well as in all tomato plant organs. As shown in Fig. 2C, growing  
222 fruits of the *plp* mutant had more ascorbate than the WT, with a peak at 12 DPA. Interestingly,  
223 the difference in ascorbate content between mutant and WT declined to become negligible at the  
224 beginning of the maturation phase (Breaker stage) but rose again during maturation. Finally, there  
225 was more ascorbate in all vegetative and reproductive organs of the mutant (Fig. 2D).

226 Next, we focused on leaves, which are easier to investigate than fruits. Since the mutated  
227 protein is a photosensor, the evolution of ascorbate across a day and night cycle was compared  
228 with those of the transcripts encoding PLP and GGP1. Every two hours, photosynthetically active  
229 radiation (PAR) and temperature were recorded (Fig. 3A), and plant material harvested. As  
230 illustrated in Fig. 3B, while the level of ascorbate was always higher in the mutant, the daily  
231 variation in ascorbate content followed the same pattern in the T2 line 15-5 mutant and the WT.  
232 Thus, in both genotypes, ascorbate increased or plateaued during the first part of the day, then  
233 decreased towards the beginning of the night to increase again during the night. This was  
234 corroborated by the changes in *GGP1* mRNA abundance, which decreased during the day and  
235 increased during the night, peaking 2 h before sunrise (Fig. 3D). Interestingly, *PLP* mRNA also



236 peaked at 4 h in the night. However, *PLP* transcripts were less decreased during the day than  
237 those encoding GGP1. Also, as expected, levels of *PLP* transcripts were significantly lower in the  
238 *plp* mutant compared to WT (Fig. 3C).

### 239 **PAS/LOV interacts with GDP-L-galactose phosphorylase in the cytosol and the nucleus** 240 **under the dependence of light signaling**

241 In Arabidopsis, previous works have suggested a potential interaction between PLP and  
242 VTC2, which was governed by the light spectrum (Ogura et al., 2008). We first studied the  
243 subcellular localization of PLP by transient expression in *Nicotiana benthamiana* leaves. For this,  
244 a 35S-GFP-PLP construct was used, either under its WT or truncated forms as well as the two  
245 GGP isoforms, *i.e.* 35S-GFP-GGP1 and 35S-GFP-GGP2. Confocal microscopy analyses showed  
246 that the WT PLP, truncated PLP, GGP1 and GGP2, all localized in the nucleus and the cytoplasm  
247 (Fig.4A). The dual localization of GGP1 is consistent with previous findings in Arabidopsis for  
248 VTC2 (Müller-Moulé, 2008), which is a homolog to GGP1. However, according to previous  
249 literature, the subcellular localization of PLP, and more generally of blue light receptors, still  
250 needs to be established. To rule out the leakage of a cleaved GFP from PLP, we performed an  
251 LC-MS/MS peptide analysis after SDS-PAGE separation of a crude protein extracts from the  
252 stable transgenic tomato harboring the GFP-PLP construct. Peptides derived from the GFP-PLP  
253 fusion protein (Suppl. Fig. 4) were detected in the gel band, corresponding to an apparent  
254 molecular mass of 73 kDa. This is consistent with the recovery of the non-truncated fused GFP-  
255 PLP protein after gel separation. No peptide derived from the GFP-PLP was detected in lower gel  
256 bands, in which cleaved products would have been expected to be recovered, confirming the  
257 integrity of the fused GFP-PLP after gel separation and, thus, during confocal microscopy  
258 analyses. Next, we tested the physical interactions of PLP with GGP1 by using the BiFC  
259 technique in simple onion cell, with a combination of vectors for the *GGP1*, *GGP2*, *PLP* and  
260 mutated *PLP* (hereafter referred to as *PLP<sup>m</sup>*) sequences (Suppl. Table 4). The interaction between  
261 the two proteins was confirmed, but not with the truncated *PLP<sup>m</sup>* protein (Suppl. Fig. 5).  
262 Interestingly, the interaction occurred in both the cytoplasm and the nucleus. Since the mutation  
263 is characterized by a truncation of the blue-light sensing LOV-domain, a further verification of  
264 the protein-protein-interactions and their light-dependency needed to be tested. For this, a  
265 heterologous system was used, thus allowing reconstructing and evaluating of the minimal

266 protein interaction complex upon introduction of the individual components. Here, we  
267 implemented mammalian cells, already known for being suitable for expressing plant proteins  
268 (Beyer et al., 2015; Müller et al., 2014), and without any additional plant-components that might  
269 preclude a straightforward analysis of the interaction. In brief, a tetracycline-based split  
270 transcription factor approach (Müller et al., 2014) was customized and used for testing the light-  
271 regulated interaction of all GGP and PLP-combinations (*GGP1*, *GGP2*, *PLP* and *PLP<sup>m</sup>*  
272 sequences, see Suppl. Table 5). The PLP and *PLP<sup>m</sup>* were C-terminally fused to the tetracycline  
273 repressor (TetR) that binds to the tetracycline operator (tetO)-motif on the reporter plasmid.  
274 *GGP1* and *GGP2* were either C- or N-terminally coupled to the transactivation domain from the  
275 herpes simplex virus type 1 virion protein16 (VP16). Only the interaction of both proteins  
276 reconstitutes a functional transcription factor, capable of binding to the tetO-motif in close  
277 proximity to the PCMVminimal promoter and inducing gene expression of the reporter gene, *via*  
278 the VP16 transactivation domain. A strong interaction was found between WT PLP and both  
279 *GGP1* and *GGP2* in darkness, while the exposure to blue light (455 nm) minimized this  
280 interaction in all tested combinations (Fig. 4B). Then, no interaction was found between the  
281 *PLP<sup>m</sup>* and *GGP1* or *GGP2*, thus confirming the effect of the truncation (Fig. 4B). Interestingly,  
282 no additional factor was needed for the interaction of the WT PLP and *GGP1* and *GGP2*. In  
283 summary, this experiment clearly showed the light-controlled interaction between PLP and GGP  
284 proteins, while the mutant protein completely lost its ability to bind *GGP1* or *GGP2*.

### 285 **Repression of ascorbate accumulation *via* PAS/LOV is modulated by light**

286 To investigate the physiological role of light signaling, we next analyzed the impact of  
287 blue, red, white lights and darkness on ascorbate content in WT and *plp* mutants. One-month-old  
288 plants grown in the greenhouse were transferred to a growth chamber equipped with LEDs  
289 emitting white, blue and/or red light. Plants were first transferred to a diel cycle of 12 h white  
290 light at 250-260  $\mu\text{mol. m}^{-2}.\text{s}^{-1}$  and 12 h of darkness for four days. Then, at dawn, they were  
291 transferred under four light regimes, 100% blue light, 100% red light or 50% blue/40% red light,  
292 respectively, and darkness or maintained under white light as control. Light intensity was the  
293 same for all conditions, except for darkness (Suppl. Fig. 6). In the WT under white light, leaf  
294 ascorbate content was increased during the first part of the photoperiod and decreased during the  
295 second part of the photoperiod (Fig. 5A-B). In the mutant, a similar evolution was found, with a

296 similar amplitude between minimum and maximum values, but a higher basic level and a more  
297 sustained increase during the day. The same pattern was found for the mutant under the different  
298 light regimes, but not for the WT, in which ascorbate was no longer increased under darkness and  
299 red light (Fig. 5C-F). Hierarchical clustering analysis showed a clear difference between WT and  
300 mutant, which clustered separately (Fig. 5G). Then, in the WT, two clusters were clearly  
301 distinguished, firstly darkness and red light, and secondly white, blue/red and blue light. This was  
302 not the case in the mutant, for which red, blue/red and darkness clustered together. These results  
303 suggest that blue light promotes ascorbate accumulation by counteracting the inhibitory effect of  
304 PLP on ascorbate synthesis. Given that GGP, one of the very few proteins described as  
305 interacting with PLP (Ogura et al., 2008), was found to interact *in vivo* with PLP (see above), we  
306 next investigated its effect on the activity of GGP *in vitro*.

### 307 **Blue light prevents PAS/LOV inhibition of GDP-L-galactose phosphorylase activity *in vitro***

308 In order to study the *in vitro* interaction between PLP and GGP, the two tomato proteins  
309 were expressed heterologously. In the case of GGP, a functional protein with characteristics  
310 relatively close to those already published (Linster et al., 2008) was obtained with *E. coli*. Indeed,  
311 using GDP-alpha-glucose as a substrate, the  $K_m$  and specific activity were respectively 17  $\mu\text{M}$   
312 and 37  $\text{U}\cdot\text{mg}^{-1}$  against 4-12  $\mu\text{M}$  and 10-16  $\text{U}\cdot\text{mg}^{-1}$  in Arabidopsis (Linster et al., 2008). In  
313 contrast, attempts to obtain a PLP capable of inhibiting GGP *in vitro* by expressing it in *E. coli*  
314 were unsuccessful, including accumulation of the protein in inclusion bodies that could only be  
315 resolubilized using chaotropic conditions. However, the latter did not make it possible to obtain a  
316 functional protein. Using a transient expression system in tobacco (Yamamoto et al., 2018) we  
317 obtained a PLP capable of inhibiting the activity of GGP (Fig. 6A). The inhibition of GGP by  
318 PLP set in quickly, probably within seconds (the time resolution of the spectrophotometer did not  
319 allow for more precise data) and was stable for hours (not shown). Heating of PLP at 95°C for 10  
320 min suppressed this effect. Strikingly, large amounts of PLP were necessary to inhibit GGP.  
321 Thus, for a GGP concentration of 3 nM, 90% inhibition was obtained with 900 nM of PLP, *i.e.* at  
322 a ratio of about 300. A kinetic study showed that the inhibition is non-competitive (Fig. 6B), PLP  
323 reducing the maximal activity but not the affinity for the substrate (here GDP-alpha-glucose).  
324 When applied to PLP before mixing with GGP, blue light ( $445 \pm 15 \text{ nm}$ ) counteracted its  
325 inhibitory effect at a level that depended on both the intensity and the duration of the illumination

326 (Fig. 6C). PLP appeared sensitive to blue light, with a response already significant at  $25 \mu\text{mol.s}^{-1}.$   
327  $\text{m}^{-2}$  and a plateau reached at around  $250 \mu\text{mol.s}^{-1}.\text{m}^{-2}$  for the rate of inactivation, confirming that  
328 the blue light intensities used in the *in vivo* experiment described above (Fig 5) were effective. In  
329 contrast, blue light had no effect when applied after having mixed PLP and GGP (not shown).  
330 Red light ( $2000 \mu\text{mol.s}^{-1}.\text{m}^{-2}$  at  $653 \pm 33 \text{ nm}$ ) also had no effect on the interaction between PLP  
331 and GGP (not shown). Finally, we tested the reversibility of the action of blue light by  
332 illuminating PLP with blue light at maximal intensity ( $2000 \mu\text{mol.m}^{-2}.\text{s}^{-1}$ ) during 2 h before  
333 transfer to darkness for 6 h, the time needed to fully recover the ‘dark’ form (Ogura et al., 2007).  
334 While after 2 h, the inhibition was 86% and 16% for PLP incubated in the darkness and under  
335 blue light, respectively, it was 77% and 32% after 6 h of additional incubation in the dark. This  
336 confirms that PLP returns to its ‘dark’ active form only very slowly following its exposure to  
337 blue light (Suppl. Fig. 7) .  
338

## 339 **Discussion**

340           Given the importance of ascorbate for human health and plant performance, the study of  
341 ascorbate metabolism in plants holds great interest from both agronomic and economic  
342 perspectives. Since the discovery of the main ascorbate biosynthetic pathway (Wheeler et al.,  
343 1998) and the characterization of the enzymes involved (Conklin 1999 and 2006; Linster et al.,  
344 2007), many studies have tried to decipher the regulatory mechanisms involved. Although it has  
345 long been known that light modulates ascorbate metabolism in plants, the underlying mechanisms  
346 were far from understood. In the present study, we identified a major player of the regulation of  
347 ascorbate metabolism by identifying the causal mutation leading to a 2 to 4-fold increase in the  
348 ascorbate content in an EMS Micro-Tom mutant. The recessive mutation corresponded to a stop  
349 codon in the *Solyc05g007020* gene that encodes a photoreceptor PAS/LOV protein. Our work  
350 allowed (i) to undoubtedly define PLP as a negative regulator of ascorbate biosynthesis, (ii) to  
351 confirm the interaction of PLP with the GGP protein, (iii) to provide *in vitro* evidence that this  
352 interaction results in the inhibition of the activity of GGP and (iv) to demonstrate that blue light  
353 counteracts this inhibition.

### 354 **Why blue light as a regulator of ascorbate synthesis?**

355           The function of PLP, which was first reported twenty years ago (Crosson et al., 2003), has  
356 remained unknown despite the demonstration of its interaction with GGP (Ogura et al., 2008) and  
357 conformational change induced by blue light (Kasahara et al., 2010). The presence of a LOV  
358 domain links it to phototropins, which have two LOV domains (LOV1 and LOV2) and initiate  
359 various responses to blue light (phototropism, opening of stomata, chloroplast movements, leaf  
360 expansion and movements) *via* autophosphorylation or even transphosphorylation (Christie,  
361 2007). Members of the ZTL/ADO family, which, like PLP, have only one LOV domain, are  
362 involved in the photo-control of flowering and regulating the circadian clock (Krauss et al.,  
363 2009). More generally, blue light stimulates shoot compactness by repressing the growth of the  
364 hypocotyl and internodes and promoting leaf thickness, or flowering, and the production of  
365 secondary compounds such as carotenoids and flavonoids, as well as photosynthesis (Huche-  
366 Thelier et al., 2016). Plants would therefore use blue light to perceive the amount of light energy  
367 available in order to optimize their developmental program, but also to protect themselves from  
368 an excess of energy, in particular thanks to the different levels of photosensitivity of the

369 photoreceptors (Christie, 2007). This idea is reinforced by the fact that flavins that generate ROS  
370 when excited by blue light are precisely the cofactors of these photoreceptors (Losi and Gartner,  
371 2012). The promoting effect of blue light on ascorbate synthesis would enable it to cope with the  
372 increase in ROS production when light intensity augments. In addition, higher ROS content tends  
373 to increase the proportion of the oxidized form of ascorbate, which is less stable (Bulley and  
374 Laing, 2016; Truffaut et al., 2017). However, while phototropins are activated by blue light,  
375 leading to the transduction of this signal *via* interaction with their target proteins, the opposite is  
376 observed with PLP which, on the one hand, targets an enzyme of the pathway and, on the other  
377 hand, no longer acts or acts very weakly once exposed to blue light. PLP would therefore  
378 represent a peculiar evolution among photoreceptors, although favored by a modular nature that  
379 has allowed the appearance of numerous combinations of domains and, therefore, of neo-  
380 functionalization during evolution (Moglich et al., 2010). Strikingly, the photocycle rate is highly  
381 variable in photoreceptors containing the LOV domain. Thus, while photoexcitation only lasts a  
382 few tens of seconds in phototropins (Kasahara et al., 2002), it is maintained much longer in  
383 members of the ZTL/ADO family with more than 60 h for FKF1 (Zikihara et al., 2006), as well  
384 as in PLP, for which several hours were necessary for a return to the dark form (Kasahara et al.,  
385 2010), a result confirmed in the present work *via* the *in vitro* measurement of its inhibitory action.  
386 The irradiation of a LOV domain causes the formation, within a few microseconds, of a covalent  
387 bond between FMN and a nearby cysteine residue (Christie et al., 2015). While after 10 seconds  
388 of exposure to blue light, a significant change in the absorption spectrum of tomato PLP  
389 expressed in *E. coli* reflecting the change of state of FMN was found (Kasahara et al., 2010),  
390 several tens of minutes were necessary to reach minimum effect of PLP on GGP. However, PLP  
391 responded to low light intensity, with the inactivation rate increasing almost linearly until it  
392 plateaued at an intensity corresponding to the fraction of blue light in direct sunlight, *i.e.* about  
393  $200 \mu\text{mol}\cdot\text{m}^{-2}\cdot\text{s}^{-1}$ . These results are not necessarily contradictory if we consider that higher  
394 intensity increases the probability that PLP inactivation would occur, inactivation being different  
395 from the change of state of FMN itself. Moreover, PLP expressed in *E. coli* was not able to  
396 inhibit GGP, while that expressed in *Nicotiana benthamiana* was. It is therefore possible that a  
397 difference in folding would affect its photosensitivity.

## 398 **How blue light promotes ascorbate synthesis in a diel cycle in leaves**

399           The results obtained here introduce an additional layer of complexity to the regulation of  
400 ascorbate metabolism in general, and GGP in particular. The latter, admitted as being the most  
401 controlling enzyme of the ascorbate synthesis pathway (Fenech et al., 2021), already known to be  
402 regulated by a range of factors, including light and stress, at the transcriptional (Bulley and  
403 Laing, 2016) and translational (Laing et al., 2015) levels, appeared to be also regulated post-  
404 translationally. This also extends the list of processes associating ascorbate synthesis and light,  
405 such as those involving the AMR1 protein (Zhang et al., 2009), and the COP9 signalosome  
406 complex (Mach 2013). It is striking that the dark form of PLP formed a stable complex with GGP  
407 that could hardly be dissociated by blue light (Fig. 7). The latter would therefore only act on  
408 newly formed copies of PLP, preventing them from interacting with GGP. The timing and  
409 amplitude of the expression of these two proteins would therefore be essential to condition their  
410 interaction. Figures 3 and 5 show that ascorbate exhibited relatively large fluctuations during  
411 day-night cycles and that the loss of PLP amplified them. In both cases, ascorbate increased  
412 during the day, dropped at the end of the day or the beginning of the night, increased again during  
413 the night, then dropped again at the beginning of the day. These fluctuations can be attributed to  
414 the amount of substrate available for ascorbate synthesis, the rate of ascorbate turnover, and the  
415 amount of active GGP (Bulley and Laing, 2016). The expression of genes encoding GGP1 (in  
416 tomato by far the most expressed of the two isoforms of this enzyme) and PLP increased at night  
417 to both peaks towards the end of the night. Interestingly, GGP1 expression was lower in the  
418 mutant (Fig. 5), a result that seems to confirm that ascorbate exerts a negative feedback on GGP  
419 expression but contradicts the absence of effect of ascorbate itself reported in Arabidopsis (Laing  
420 et al., 2015; Bulley et al., 2021), suggesting that another factor could be at play. The fact that  
421 ascorbate increased indicates that there were not enough copies of PLP to neutralize all those of  
422 GGP formed overnight. Thereafter, GGP expression dropped to zero or very low for most of the  
423 day, while PLP expression was retained and even increased during the day. Consequently, the  
424 number of copies of PLP would then become sufficient to block GGP, as evidenced by the  
425 decrease in ascorbate observed in the WT, but not in the mutant during the photoperiod under red  
426 light. In contrast, this is not true under white or blue light under which PLP would be deactivated  
427 (Fig. 5). Taken together, these elements suggest that the stoichiometry between GGP and PLP  
428 plays an essential role, the interaction between PLP and blue light making it possible to adjust the  
429 production of ascorbate to light intensity and ultimately to the production of light-dependent  
15

430 ROS. Therefore, it will be interesting to study the turnover of both proteins in diel cycles and  
431 under various light regimes, but also in other organs, in particular fruit, in which PLP also  
432 modulates ascorbate synthesis (Fig. 2). In the meantime, it seemed interesting to investigate  
433 whether transcriptomic and proteomic data would be available for these two genes.

#### 434 **Regulation of ascorbate synthesis by PAS/LOV as an unusual and costly mechanism**

435 Available transcriptomic data indicate that the expression levels of GGP and PLP are  
436 elevated (Suppl. Fig. 8A-B). Thus, in the Arabidopsis leaf during a day-night cycle (Bläsing et  
437 al., 2005), VTC2 was among the 2-3% and PLP among the 10-30% of the most highly expressed  
438 genes based on their average expression. Interestingly, the expression of PLP was strongly  
439 stimulated during the night in a starchless mutant, probably related to carbon starvation occurring  
440 at night in the mutant (Bläsing et al., 2005). Indeed, this gene is one of the genes most strongly  
441 repressed by sucrose and glucose (Bläsing et al., 2005). Yet, neither PLP nor VTC2 (GGP1) was  
442 found among the almost 5000 proteins recently detected in a day-night cycle in the leaves of the  
443 same Arabidopsis accession (Uhrig et al., 2021). Similar results were found during tomato fruit  
444 development (Belouah et al., 2020), where the expression levels of GGP1 and PLP were also  
445 high, being respectively among the 2% and 22% of the most highly expressed genes based on the  
446 average calculated for the entire development (Suppl. Fig. 8C-D). The encoded proteins were still  
447 not found among more than 2800 proteins detected. These proteins were also not present in a  
448 larger dataset of almost 8000 proteins detected in tomato fruit (Szymanski et al., 2017). These  
449 observations are supported by the fact that the activity of GGP measured in the leaves of  
450 Arabidopsis is very low (Yoshimura et al., 2014). Among the explanations for such a  
451 discrepancy, one could invoke 'inefficient' translation, in particular for GGP whose translation is  
452 jointly repressed by uORF and ascorbate (Laing et al., 2015), and/or high instability of the  
453 protein. It therefore seems relevant to ask whether the interaction between the two proteins leads  
454 to their degradation. Indeed, we found *in vitro* that the interaction was stable for at least several  
455 hours and could not be reversed even by the application of very intense blue light. The ratio of  
456 300 found between PLP and GGP to block the activity of the latter may be overestimated, given  
457 that the proportion of functional protein among purified PLP was not known. In order to learn  
458 more about the stoichiometry between these two proteins, it will be interesting to carry out  
459 crystallography studies. Apart from blocking copies of PLP but also of GGP, this suggests that



460 the interaction *in vivo* between GGP and PLP could lead to the degradation of GGP or even that  
461 of PLP. The dual localization between the cytosol and the nucleus observed by microscopy could  
462 be linked to the turnover of these proteins. Indeed, LKP2, a member of the ZTL/ADO family  
463 located in the nucleus, has been shown to form a complex that functions as a ubiquitin E3 ligase  
464 and interacts with the circadian clock (Yasuhara et al., 2004), probably by addressing one or  
465 more components of the latter to the 26S proteasome. It would therefore be interesting to search  
466 for a similar mechanism that would involve PLP and GGP. It is also worth mentioning that two  
467 members of the TALE homeodomain protein transcription factor family, which is involved in  
468 numerous developmental processes (Hackbusch et al., 2005), have been identified as interacting  
469 with PLP by a double-hybrid screening of an Arabidopsis cDNA library (Ogura et al., 2008).

470 Finally, the mechanism regulating ascorbate synthesis shown here appears to be very  
471 costly with respect to GGP expression. However, the very high expression of GGP can also be  
472 seen as providing a great flexibility in response to stress. For example, an increase in sugars,  
473 often observed in response to various stresses, would repress the expression of PLP, thus making  
474 it possible to quickly increase the activity of the most controlling enzyme of the ascorbate  
475 synthesis pathway. These valuable data on the regulation of ascorbate metabolism will also make  
476 it possible to envisage new strategies for improving the nutritional quality of cultivated plants and  
477 their ability to withstand environmental stresses.

478

## 479 **Materials and Methods**

### 480 **Plant material and culture conditions**

481 *Solanum lycopersicum* L. cv. Micro-Tom was used for all experiments performed in this  
482 study. Plant culture conditions in greenhouse were as in Rothan et al. (2016). To study the effect  
483 of light on ascorbate, experiments were carried out in spring or summer with one-month old  
484 plants grown in the greenhouse. Thereafter, the plants remained either in the greenhouse in the  
485 case of the analysis of the ascorbate change in the time course of fruit development or the whole  
486 plant organs. For the “light assay”, the harvesting time of the plant materials was designed  
487 according to the light period ([https://jekophoto.eu/tools/twilight-calculator-blue-hour-golden-](https://jekophoto.eu/tools/twilight-calculator-blue-hour-golden-hour/)  
488 [hour/](https://jekophoto.eu/tools/twilight-calculator-blue-hour-golden-hour/)). This experiment was carried out in perfect weather conditions two times, on May 19th and  
489 July 10th, 2018. One-month-old plants cultured in the green house were moved out the night  
490 before the beginning of the experiment, the starting time was at 10 am, and every two hours 3  
491 leaves per plant on three plants were harvested. At the same time temperature, hygrometry,  
492 photosynthetically active radiation (PAR, in  $\mu\text{mol}$  of photons  $\text{m}^{-2}\text{s}^{-1}$ ) were measured with a  
493 Quantum photometer with a light sensor LI-190R (LI-COR Corporate, Lincoln Nebraska, USA)  
494 while the light spectrum was recorded with a JAZ Spectrometer (Ocean Optics Inc, Largo,  
495 Florida, USA).

496 To investigate the effect of the light spectrum, one-month-old plants were cultured in  
497 growth chambers (HiPoint Bionef Montreuil, France) as illustrated in Suppl. Figure 6. Moving  
498 plants from the greenhouse to the growth chambers was done at night to avoid any stress. Then,  
499 the plants were acclimatized for three days under a 12 h photoperiod of white light with a  
500 photosynthetic photon flux density of around 260-265  $\mu\text{mol}$  photons  $\text{m}^{-2} \text{s}^{-1}$  at 10 cm of the LED  
501 source and corresponding to the height of top leaves. The day/night temperature and relative  
502 hygrometry were 25/20°C and 65-60%, respectively. The first hour of the photoperiod (9 am to  
503 10 am) was programmed as a ramp resulting to a linear increase of the light intensity up to the  
504 set-up, and reversely at night to a decrease between (8 pm to 9 pm) to the return of darkness, in a  
505 way to mimic sunrise and sunset, respectively. The fourth day, the same culture conditions were  
506 maintained, and the first harvesting time of 3 leaves per plant on four plants was at 8 am, just  
507 before the beginning of the photoperiod and then every two to three hours. On the fifth day, the  
508 plants were submitted to four light conditions, white (as control), blue, red, blue and red, and

509 darkness, and the leaves were harvested up to the end of the next night. For each light condition,  
510 the photon flux density was maintained at 260-270  $\mu\text{mol photons m}^{-2} \text{s}^{-1}$  (Suppl. Fig.6).

511 For the transient transformation experiments by agroinfiltration, WT *Nicotiana*  
512 *benthamiana* L. plants were cultured in soil during one month in the greenhouse before being  
513 used. Watering was carried out three times per week, but only once with a Liquoplant fertilizing  
514 solution (1.85 g L<sup>-1</sup>, Plantin SARL Courthézon, France) and twice using tap water at pH 6. For  
515 the BiFC (Bimolecular Fluorescence complementation) analyses by confocal microscopy, freshly  
516 harvested onion *Allium cepa* was purchased from the local market.

517 To determine ascorbate content, leaves or fruits at several stages of development were  
518 collected, cut into small pieces and immediately quenched into liquid nitrogen. Samples were  
519 stored at -80°C until extraction.

## 520 **Mapping-by-sequencing**

521 Mapping-by-sequencing was performed as described in Garcia et al. (2016). A mapping  
522 BC<sub>1</sub>F<sub>2</sub> population of 440 plants was created by crossing the P21H6 cv Micro-Tom ascorbate-  
523 enriched mutant line with a WT cv Micro-Tom parental line. Two bulks were then constituted by  
524 pooling 44 plants displaying either a mutant fruit phenotype (AsA<sup>+</sup> bulk) or 44 plants with a WT  
525 phenotype (WT-like bulk). To this end, 25 leaf discs (5 mm diameter each) were collected from  
526 each BC<sub>1</sub>F<sub>2</sub> plant (approximately 60 mg fresh weight) and pooled into the AsA<sup>+</sup> bulk and in the  
527 WT-like bulk. The same amount of plant material was also collected from the WT parental line.  
528 Genomic DNA was extracted from each bulk and the parental line using a cetyl-trimethyl-  
529 ammonium bromide method as described by Garcia et al. (2016). DNA was suspended in 200 mL  
530 of distilled water and quantified by fluorometric measurement with a Quant-it dsDNA assay kit  
531 (Invitrogen). Illumina paired-end shotgun-indexed libraries were prepared using the TruSeq DNA  
532 PCR-Free LT Sample Preparation Kit according to the manufacturer's instructions (Illumina).  
533 The libraries were validated using an Agilent High Sensitivity DNA chip (Agilent Technologies)  
534 and sequenced using an Illumina HiSeq 2000 at the INRA EPGV facility, operating in a 100-bp  
535 paired-end run mode. Raw fastq files were mapped to the tomato reference genome sequence *S.*  
536 *lycopersicum* build release SL3.0 (<ftp://ftp.solgenomics.net>) using BWA version 0.7.12 (Li and  
537 Durbin, 2009; <http://bio-bwa.sourceforge.net/>). Variant calling (SNPs and INDELs) was  
538 performed using SAMtools version 1.2 (Li et al., 2009; <http://htslib.org>). As the tomato reference

539 genome (cv Heinz 1706) used to map the reads is distinct from that of cv Micro-Tom, the  
540 variants identified would include both cv Heinz 1706/cv Micro-Tom natural polymorphisms in  
541 addition to EMS mutations. In this context, additional sequencing to a minimum depth of 203 of  
542 the cv Micro-Tom line was performed to take into account and further remove the cv Heinz  
543 1706/cv Micro-Tom natural polymorphism. The output file included various quality parameters  
544 relevant to sequencing and mapping that were subsequently used to filter the variants. The cv  
545 Micro-Tom line output file (.vcf) included all variants (SNPs plus INDELS) corresponding to  
546 natural polymorphisms between cv Micro-Tom and cv Heinz 1706. The two .vcf output files  
547 obtained from the AsA+ and WT-like bulks included variants (SNPs plus INDELS)  
548 corresponding to natural polymorphisms between cv Micro-Tom and cv Heinz 1706 and also to  
549 EMS mutations. The .vcf files were annotated using SnpEff version 4.1  
550 (<http://snpeff.sourceforge.net/SnpEff.html>; Cingolani et al., 2012) using ITAG2.40 gene models  
551 (<ftp://ftp.solgenomics.net>) SNP allelic frequencies between AsA+ and WT-like bulks and the cv  
552 Micro-Tom parental line were compared using a custom Python script version 2.6.5  
553 (<https://www.python.org>). Once the putative causal mutation was detected using the mapping-by-  
554 sequencing procedure, the EMS-induced SNPs flanking the putative mutation were used as  
555 markers for genotyping the BC<sub>1</sub>F<sub>2</sub> individuals using a KASP assay (Smith and Maughan, 2015).  
556 Specific primer design was performed using batchprimer3 software (Smith and Maughan, 2015;  
557 <http://probes.pw.usda.gov/batchprimer>), and genotyping was done using KASP procedures (LGC  
558 Genomics).

### 559 **CRISPR/Cas 9 gene editing of PLP and stable tomato transformation**

560 CRISPR/Cas9 gene editing was performed as described in Fauser et al. (2014). A  
561 construction comprising a single sgRNA alongside the Cas9 endonuclease gene, was designed to  
562 induce target deletions in PAS/LOV-coding sequence. The sgRNA target sequence was designed  
563 using CRISPR-P 2.0 web software (<http://crispr.hzau.edu.cn/CRISPR2/>; Lei et al., 2014). Since  
564 targeting-RNAs are inserted into pDECAS9 vector, the final plasmid was used to transform  
565 Micro-Tom tomato cotyledons through Agrobacterium infection as described in Fernandez et al.  
566 (2009). The T0 plants resulting from the regeneration of the cotyledons were genotyped and their  
567 fruits were phenotyped for ascorbate content. T1 seeds from selected ascorbate-enriched T0  
568 plants were sown for further characterization. The CRISPR/Cas9 positive lines were further

569 genotyped for indel mutations using primers flanking the target sequence. To obtain tomato  
570 plants overexpressing the GFP-PLP fusion protein, the *Pro35S:eGFP-PLP* construct in  
571 pK7WGF2 vector was used for the transformation as described above. All primers used for  
572 cloning are shown in Suppl. Table 5.

### 573 **Ascorbate assay**

574 Samples were ground to a fine powder using a TissueLyser II (Qiagen). Ascorbate content  
575 was assayed using a protocol adapted from Bergmeyer (1987) using 40 and 100 mg FW for  
576 leaves and fruits, respectively, extracted in 400  $\mu$ L 0.1 M HCl. For the determination of total  
577 ascorbate, 20  $\mu$ L of extract were first incubated 10 min in 0.15 M HEPES/KOH pH 7.5 and 0.75  
578 mM DTT. N-Ethyl maleimide was added to reach 0.035% w/v. After 10 min, 1 unit.mL<sup>-1</sup> of  
579 ascorbate oxidase was added. After 20 min, phenazine ethosulfate and thiazolyl blue mix were  
580 added for final concentrations of respectively 0.3 mM and 0.6 mM. The thiazolyl blue mix was  
581 prepared as following: 10 mM thiazolyl blue, 0.2 M Na<sub>2</sub>HPO<sub>4</sub>, 0.2 M citric acid, 2 mM EDTA  
582 and 0.3% v/v Triton X100 at pH 3.5. All steps were performed in a polystyrene microplate and at  
583 room temperature. Measurements were performed at 570 nm in MP96 readers (SAFAS,  
584 Monaco). For reduced ascorbate, the same protocol was used, except steps involving DTT and N-  
585 ethylmaleimide were omitted.

### 586 **RT-qPCR analysis**

587 Total RNA was extracted from leaves using Trizol reagent (Invitrogen) and purified with a  
588 RNeasy Plant Mini Kit (Qiagen). Relative transcript levels were determined as described  
589 previously (Deslous et al. 2021) using gene-specific primers and *eIF4A* and  *$\beta$ -tubulin* as an  
590 internal control. The primer sequences are shown in Suppl. Table 5.

### 591 **Protein subcellular localization**

592 All constructs used were realized using gateway® technology (Invitrogen). The cDNA  
593 without STOP codon (NS) of GGP1, GGP2, PLP and PLP<sup>m</sup> were synthesized by GeneArt® Gene  
594 Synthesis (Invitrogen), and directly provided into entry vector pDONR201™ (Suppl. Table 5).  
595 The mutation of PLP construct was the same as the one identified in EMS mutant. In order to  
596 obtain fusion proteins with fluorescent tag either in C-terminal or N-terminal, specific primers  
597 (listed in Suppl. Table 6) was used to add a STOP codon and the flanking AttB sequences by  
598 PCR reaction. Classical BP recombination reactions allowed to insert the new sequences into a  
21

599 pDONR201<sup>TM</sup> and then LR reaction permitted to transfer our sequence of interest into the  
600 different destination vectors. The *Agrobacterium tumefaciens* electro-competent strain GV3101  
601 was transformed with the above fluorescent fusion constructs. Transformed agrobacteria were  
602 selected on LB medium supplemented with suitable antibiotics and conserved at -80°C. Prior to  
603 agroinfiltration, inoculated LB cultures were incubated overnight at 28°C until 0.6 to 0.8  
604 OD<sub>600nm</sub>. For subsequent infiltration, the culture was centrifuged and the pellet suspended in  
605 water to reach 0.2 OD<sub>600nm</sub> in the case of sub-cellular localization. Then, 50-100µL of this  
606 bacterial solution was infiltrated in the leaf epidermis of three-week-old *N. benthamiana* plants at  
607 the level of a wounding by needle using a 1 mL syringe to improve infiltration. The plants were  
608 maintained in normal culture conditions (light, temperature) for 48h and the observation was  
609 carried out on the underside of the leaf epidermis.

### 610 **Protein interactions in plant cell**

611 To assess the interaction of PLP and GGP1 in plant cell, a BiFC (Bimolecular  
612 Fluorescence Complementation) (Walter, 2004) experiment was performed in onion epidermal  
613 cells by biolistic transformation. Each cDNA of the genes of interest were inserted using the  
614 GATEWAY technique in different vectors in order to test all possible orientations of the protein  
615 fusions (Suppl. Table 5). Then, 2.5 µg of plasmid DNA of each construct were mixed with 25 µl  
616 of a suspension (250 µg / µl) of gold micro-particles (diameter = 0.6 µm) in 50% ethanol (v / v)  
617 then 25 µl of 2.5 M CaCl<sub>2</sub> and 10 µl of 0.1 M spermidine are added. The micro-particles were let  
618 to sediment for 10 min before being washed with 70% and 100% (v/v) ethanol. Eight microliters  
619 of the micro-particle suspension (30 µl) were used for transformation of epidermal onion cells  
620 using the PDE-1000He particle gun (Bio-rad). Before transformation, the onion epidermis was  
621 taken from the innermost scales of the bulb and deposited, upper face in contact with MS  
622 medium. Transformation of onion epidermis cells was performed at a pressure of 710 mm Hg at a  
623 helium pressure of 1100 psi and at a distance of 6 cm.

### 624 **Imaging**

625 Live imaging was performed in the plant imaging division of the BIC platform (Bordeaux  
626 Imaging Centre), using a Zeiss LSM 880 confocal laser scanning microscopy system equipped  
627 with 40x objectives. The excitation wavelengths used for the eGFP (or YFP) and mCherry were  
628 514 and 543 nm, respectively. The emission windows defined for their observation were

629 respectively between 525 and 600 nm for the eGFP (or YFP) and between 580 and 650 nm for  
630 the mCherry.

### 631 **Optogenetic assay**

632 In this animal cell system, human embryonic kidney cells, namely HEK-293T, were  
633 transfected by a combination of plasmids (Suppl. Table 5) and cultured as described by Müller et  
634 al. (2013). For the experimental set-up, 50,000 cells were seeded into 24-well plates. 24 h after  
635 seeding cells were transfected using a polyethylenimine-based (PEI, linear, MW: 25 kDa,  
636 Polyscience) method, as described elsewhere (Müller et al., 2013). If co-transfected, plasmids  
637 were applied in equal -weight-based- amounts. Four hours post transfection, the cell-culture  
638 medium was exchanged by prewarmed fresh medium under green safelight conditions. 20 h later,  
639 cells were illuminated, using LED-panels emitting blue light of a wavelength of 455 nm for 24 h  
640 (reporter gene activity) while control cells were kept in the dark. The quantitative determination  
641 of the activity of the secreted alkaline phosphatase (SEAP) in the cell culture medium was  
642 performed by using a previously described colorimetric assay (Müller et al., 2014; Beyer et al.,  
643 2015).

### 644 **Proteomic analysis**

645 Protein samples from tomato leaves were prepared by grinding 200 mg of leaves in 1 mL  
646 of 2x Laemmli buffer for 5 min in liquid nitrogen. Proteins were further solubilized by heating at  
647 80°C for 20 min. The insoluble material was removed by centrifugation (20 min at 13,000g), and  
648 the proteins of the supernatant were separated by SDS-PAGE (Laemmli, 1970) using 4%  
649 stacking gel and 10% running gel. After colloidal blue staining, 3 bands were cut out from the  
650 SDS-PAGE 10% gel and subsequently cut in 1 mm x 1 mm gel pieces. Gel pieces were destained  
651 in 25 mM ammonium bicarbonate 50% acetonitrile, rinsed twice in ultrapure water and shrunk in  
652 acetonitrile for 10 min. After acetonitrile removal, gel pieces were dried at room temperature,  
653 covered with the trypsin solution (10 ng/μL in 40 mM NH<sub>4</sub>HCO<sub>3</sub> and 10% acetonitrile),  
654 rehydrated at 4 °C for 10 min, and finally incubated overnight at 37°C. Spots were then incubated  
655 for 15 min in 40 mM NH<sub>4</sub>HCO<sub>3</sub> and 10% acetonitrile at room temperature with rotary shaking.  
656 The supernatant was collected, and an H<sub>2</sub>O/acetonitrile/HCOOH (47.5:47.5:5) extraction solution  
657 was added onto gel slices for 15 min. The extraction step was repeated twice. Supernatants were

658 pooled and concentrated in a vacuum centrifuge to a final volume of 30  $\mu$ L of 0.01% HCOOH.  
659 Digests were finally stored at -20 °C.

660 The peptide mixture was analyzed on an Ultimate 3000 nanoLC system (Dionex,  
661 Amsterdam, The Netherlands) coupled to an Electrospray Q-Exactive quadrupole Orbitrap  
662 benchtop mass spectrometer (Thermo Fisher Scientific, San Jose, CA). Ten microliters of peptide  
663 digests were loaded onto a 300- $\mu$ m-inner diameter x 5-mm C18 PepMap™ trap column (LC  
664 Packings) at a flow rate of 30  $\mu$ L/min. The peptides were eluted from the trap column onto an  
665 analytical 75-mm id x 25-cm C18 Pep-Map column (LC Packings) with a 4–40% linear gradient  
666 of solvent B in 108 min (solvent A was 0.1% formic acid in 5% acetonitrile, and solvent B was  
667 0.1% formic acid in 80% acetonitrile). The separation flow rate was set at 300 nL/min. The mass  
668 spectrometer operated in positive ion mode at a 1.8-kV needle voltage. Data were acquired using  
669 Xcalibur 2.2 software in a data-dependent mode. MS scans ( $m/z$  350-1600) were recorded at a  
670 resolution of  $R = 70\,000$  (@  $m/z$  200) and an AGC target of  $3 \times 10^6$  ions collected within 100  
671 ms. Dynamic exclusion was set to 30 s and top 12 ions were selected from fragmentation in HCD  
672 mode. MS/MS scans with a target value of  $1 \times 10^5$  ions were collected with a maximum fill time  
673 of 100 ms and a resolution of  $R = 17500$ . Additionally, only +2 and +3 charged ions were  
674 selected for fragmentation. Others settings were as follows: no sheath nor auxiliary gas flow,  
675 heated capillary temperature, 250 °C; normalized HCD collision energy of 25% and an isolation  
676 width of 2  $m/z$ .

### 677 **Heterologous expression and purification of PLP and GPI**

678 The codon-optimized PLP was chemically synthesized by Proteogenix (Schiltigheim,  
679 France) and then cloned into the pET32a vector (Novagen). The PLP was expressed as a fusion  
680 protein with thioredoxin and His<sub>6</sub> at the N-terminus in *E. coli* BL21(DE3)pLysS (Novagen) host  
681 cell. A bacterial culture was performed as described in Kasahara et al. (2010). The  
682 BL21(DE3)pLysS transformant harboring the PLP construct was grown at 25°C in M9 medium  
683 supplemented with ampicillin (100  $\mu$ g mL<sup>-1</sup>) and chloramphenicol (25  $\mu$ g mL<sup>-1</sup>). When the  
684 culture reached 0.35 OD<sub>600nm</sub>, the PLP expression was induced in the presence of 1 mM isopropyl  
685  $\beta$ -D-thiogalactopyranoside for 18 h at 25 °C. The cells were harvested by centrifugation, the  
686 pellet suspended in 30 mL of lysis buffer (Tris-HCl 50 mM pH8, NaCl 0.5 M, glycerol 2% (v/v),  
687 5 mM  $\beta$ -mercaptoethanol, 0.2% Sarkosyl, imidazole 50 mM, protease inhibitor cocktail EDTA



688 free (Roche), lysozyme 100  $\mu\text{g mL}^{-1}$ ) keep at room temperature for 20 min. Then, the suspension  
689 was frozen in nitrogen liquid and thaw at 25°C twice, before sonication for 15 min on ice. The  
690 lysate was centrifuged at 30,000g for 30 min at 4 °C, and the supernatant was filtered on 0.45  $\mu\text{m}$   
691 units before loading onto a nickel-Sepharose Fast Flow column (1mL of bed volume) using an  
692 ÄKTA™ Start Fast Protein Liquid Chromatography system (GE Healthcare). The PLP protein  
693 was eluted at 160 mM imidazole. The fractions containing the PLP peak were pooled and  
694 desalted on PD10 column equilibrated with HEPES/KOH 50mM pH7.5, glycerol 2 % and  
695 Sarkosyl 0.2 % (w/v) 5 mM  $\beta$ -mercaptoethanol, then concentrated using Vivaspin® 6  
696 concentrators (Sartorius Stedim Lab Ltd, UK) and stored at -80 °C before use.

697 The full-length coding sequence of GGP1 was amplified by PCR and cloned into the  
698 pET28a vector (Novagen). The GGP1 enzyme was expressed in *E. coli* BL21(DE3)pLysS strain  
699 as a fusion protein with His<sub>6</sub> at the N terminus. The BL21(DE3)pLysS transformant harboring the  
700 GGP1 construct was grown at 37°C in LB (500 mL) medium supplemented with kanamycin (50  
701  $\mu\text{g mL}^{-1}$ ) and chloramphenicol (25  $\mu\text{g mL}^{-1}$ ). When the culture reached 0.5 OD<sub>600nm</sub>, the GGP1  
702 expression was induced in the presence of 1 mM isopropyl  $\beta$ -D-thiogalactopyranoside for 6 h at  
703 37 °C. The protein extraction and purification were performed as described above without adding  
704  $\beta$ -mercaptoethanol and Sarkosyl in the lysis and desalting elution buffers.

#### 705 **PLP expression in Tobacco and purification**

706 The expression of PLP in Tobacco plants was carried out as described by Yamamoto et al.  
707 (2018). Briefly, the full-length coding sequence of PLP with His<sub>6</sub> at the N terminus was amplified  
708 by PCR and inserted into Sall-digested pBYR2HS vector using the In-Fusion Snap Assembly  
709 Master Mix (Takara Bio). The leaves of four-week-old *N. benthamiana* plants were infiltrated  
710 with the *Agrobacterium tumefaciens* GV3101, harboring pBYR2HS-PLP with OD<sub>600nm</sub> adjusted  
711 approximately at 0.5. Once infiltrated, the plants were sprayed with a 200 mM ascorbate solution  
712 containing 0.1% Triton X-100 as described by Nosaki et al. (2021). At last, the plants were  
713 grown under 16 h photoperiod of red light with a photosynthetic photon flux density of around  
714 260-265  $\mu\text{mol photons m}^{-2} \text{ s}^{-1}$  in a growth chamber with a day/night temperature and relative  
715 hygrometry of 25/20 °C and 65-60 %; respectively. After four days, whole infiltrated leaves were  
716 harvested and stored at -80 °C until protein extraction.

717 The infiltrated *N. benthamiana* leaves were ground using mortar and pestle in liquid  
718 nitrogen. All the following steps were carried out at 4 °C. Five g of leaf powder were  
719 homogenized in 40 mL of extraction buffer (50 mM Na-phosphate pH 7.5, 0.5 mM NaCl, 2%  
720 glycerol (v/v), 0.2% Tween 20 (v/v), 50 mM imidazole and 5 mM  $\beta$ -mercaptoethanol) using a  
721 Polytron PT2100 for 20 s. The homogenate was centrifuged at 30,000g for 30 min, and the  
722 supernatant was clarified using 0.45  $\mu$ m filters before loading onto a nickel-Sepharose Fast Flow  
723 column (5 mL of bed volume) using an ÄKTA<sup>TM</sup> Start Fast Protein Liquid Chromatography  
724 system (GE Healthcare). The column was washed with 40 mL of extraction buffer, followed by  
725 15 mL of extraction buffer with 90 mM imidazole. Proteins were then eluted with a linear  
726 imidazole gradient (0.09–0.5 M). The 3 mL-fractions were analyzed by 10% SDS-PAGE gel  
727 electrophoresis, those containing the protein of interest were desalted on PD10 column  
728 equilibrated with 50 mM HEPES/KOH pH 7.5, 2% glycerol (v/v) and 0.2% Tween 20 (v/v), then  
729 concentrated using Vivaspin® 6 concentrators (Sartorius Stedim Lab Ltd, UK) and stored at -  
730 80°C before use.

### 731 **Assay of GDP-L-galactose phosphorylase activity**

732 For the determination of GGP activity under substrate-saturating conditions, a continuous  
733 assay was used in which GGP extract was incubated at 25°C in the presence of 50 mM  
734 HEPES/KOH pH 7.5, 10 mM MgCl<sub>2</sub>, 2 mM EDTA, 1 mM GDP-glucose, 20 mM phosphate, 2  
735 mM phosphoenolpyruvate, 0.5 mM NADH, 1 unit.mL<sup>-1</sup> pyruvate kinase and 1 unit.mL<sup>-1</sup> lactate  
736 dehydrogenase. Changes in absorbance were measured at 340 nm in a filter-based MP96  
737 microplate reader (SAFAS, Monaco) until rates were stabilized.

738 The effect of light was tested by incubating purified PLP in 50 mM HEPES/KOH pH 7.5, 0.2%  
739 (v/v) Tween 20, 2% (v/v) glycerol and 1  $\mu$ M FMN, under a LedHUB light source (Omicron  
740 Laserage, Laserprodukte GmbH, Rodgau-Dudenhofen, Germany) emitting at 445  $\pm$  15 nm or 653  
741  $\pm$  33 nm, at intensities ranging from 0 to 2000  $\mu$ mol.m<sup>-2</sup>.s<sup>-1</sup>.

### 742 **Database search and results processing**

743 Data were searched by SEQUEST through Proteome Discoverer 2.2 (Thermo Fisher  
744 Scientific Inc.) against the *Solanum lycopersicum* protein database downloaded from the SGN  
745 website (version ITAG3.2; 35768 entries) in which the sequences of the 3 constructs were added.  
746 Spectra from peptides higher than 5000 Da or lower than 350 Da were rejected. The search

747 parameters were as follows: mass accuracy of the monoisotopic peptide precursor and peptide  
748 fragments was set to 10 ppm and 0.02 Da respectively. Only b- and y-ions were considered for  
749 mass calculation. Oxidation of methionines (+16 Da) was considered as variable modification  
750 and carbamidomethylation of cysteines (+57 Da) as fixed modification. Two missed trypsin  
751 cleavages were allowed. Peptide validation was performed using Percolator algorithm (Käll et al.,  
752 2007) and only “high confidence” peptides were retained corresponding to a 1% False Positive  
753 Rate at peptide level.

#### 754 ***Supplemental Material***

755 Supplemental Figure 1. Screening of the EMS Micro-Tom population.

756 Supplemental Figure 2. Identification of the *plp* mutation responsible for the ascorbate-enriched  
757 fruit phenotype by Mapping-by-sequencing.

758 Supplemental Table 1. Illumina sequencing of BC<sub>1</sub>F<sub>2</sub> bulk individuals displaying an ascorbate-  
759 enriched mutant fruit or a WT-like fruit.

760 Supplemental Table 2. Number of SNPs in the mutant and the WT-like bulks for the P21H6-3  
761 mutant.

762 Supplemental Figure 3. CRISPR Cas9 strategy for the PLP gene.

763 Supplemental Table 3. Ascorbate content in rep ripe fruits of T0 and T1 CRISPR *plp* plants.

764 Supplemental Figure 4. Subcellular localization of PLP in tomato and proteomic analysis of the  
765 leaf extract.

766 Supplemental Figure 5. *in vivo* protein-protein interaction of PLP and GGP1.

767 Supplemental Table 4. Result of the different combinations tested for the BiFC experiments  
768 between GGP1 and PLP or PLP<sup>m</sup>.

769 Supplemental Table 5. Set of oligos and plasmids used in this study.

770 Supplemental Figure 6. Pictures of tomato plants cultured in growth chamber under different  
771 light regimes and the corresponding light spectra measured at INRAE Bordeaux.

772 Supplemental Figure 7. Reversibility of the effect of blue light on GDP-L-galactose  
773 phosphorylase (GGP) inhibition by PAS/LOV (PLP).

774 Supplemental Figure 8. Evolution over time of transcripts encoding GDP-L-galactose  
775 phosphorylase (GGP) and the PAS/LOV protein.

776 .

### 777 ***Acknowledgments***

778 The authors are grateful to C. Cheniclet and L. Brocard from the Bordeaux Imaging Center for  
779 their assistance in the cytological analysis, S. Claverol from the Plateforme Protéome of the  
780 Centre Génomique Fonctionnelle Bordeaux for the proteomic analysis, and all the master  
781 students, C. Cerruti, S. Barré, M. Alonso, H. El Ouarrat, R. Gomez, D. Taillis, J. Hunziker, J.  
782 Paillassa and M. Zion who helped in the screening and the phenotypic characterization of the  
783 mutants. A special thanks to I. Atienza who took care of the plants during all these years. L.  
784 Lejay is also acknowledged for the scientific discussion in the framework of the INRAE BAP  
785 RARE project.

### 786 ***Funding***

787 This work was supported by Région Aquitaine [Con. 20111201002] (C.B. and P.D.), Syngenta  
788 Seeds SAS [CA Tom AsA INRA MD 0502-TG\_SYN-MD1505] (C.B.), PHENOME (ANR-11-  
789 INBS-0012), INRAE BAP RARE and LIA FreQUenCE INRAE-Tsukuba University (2020-  
790 2024).

### 791 ***Author Contributions***

792 C.Bo. screened the EMS population and contributed to the identification of the causal mutation.  
793 P.D. validated the candidate gene and performed microscopy experiments. T.B. performed the  
794 optogenetic analysis. K.Mo., J.-P.M. and J.J. performed the generation of CRISPR lines and the  
795 stable transgenic line. S.G. performed the transcriptional analysis. C.Br. and L.F. performed the  
796 genetic analysis. S.C. and L.Be. performed the LC-MS proteomic analysis. K.Mo., K. Mi., L.Ba.  
797 and P.B. performed the protein expression and purification experiments. C.C., M.M. and Y.G.  
798 performed the enzymatic analysis. G.D., C.F. and D.J. participated in the set-up of the plant  
799 culture and growth chambers. C.Bo., K.Mo., P.D., Y.G. and P.B. wrote the manuscript with input  
800 from the other authors. P.P. contributed to the scientific input and English editing of the  
801 manuscript. All authors read and approved the manuscript.

802

803

804 **References**

- 805 **Alimohammadi, M., Silva, K. de, Ballu, C., Ali, N. and Khodakovskaya, M. V.** (2012)  
806 Reduction of inositol (1,4,5)–trisphosphate affects the overall phosphoinositol pathway and leads  
807 to modifications in light signalling and secondary metabolism in tomato plants. *J. Exp. Bot.*, 63,  
808 825–835
- 809 **Bartoli, C.G., Tambussi, E.A., Diego, F. and Foyer, C.H.** (2009) Control of ascorbic acid  
810 synthesis and accumulation and glutathione by the incident light red/far red ratio in *Phaseolus*  
811 *vulgaris* leaves. *FEBS Lett*, 583, 118–122
- 812 **Beyer, H. M., Juillot, S., Herbst, K., Samodelov, S. L., Müller, K., Schamel, W. W., Römer,**  
813 **W., Schäfer, E., Nagy, F., Strähle, U., et al.** (2015). Red Light-Regulated Reversible Nuclear  
814 Localization of Proteins in Mammalian Cells and Zebrafish. *ACS Synth. Biol.* 4, 951–958.
- 815 **Belouah, I., Bénard, C., Denton, A., Blein-Nicolas, M., Balliau, T., Teyssier, E., Gallusci, P.,**  
816 **Bouchez, O., Usadel, B., Zivy, M., Gibon, Y., Colombié, S.** (2020) Transcriptomic and  
817 proteomic data in developing tomato fruit. *Data in Brief*, 28, 105015. DOI:  
818 10.1016/j.dib.2019.105015
- 819 **Bergmeyer, H.U.** (1987) *Methods of enzymatic analysis*. VCH, Weinheim, Germany.
- 820 **Briggs, W.R.** (2001) The Phototropin Family of Photoreceptors. *Plant Cell Online*, 13, 993–997
- 821 **Bläsing, O.E., Gibon, Y., Günther, M., Höhne, M., Morcuende, R., Osuna, D., Thimm, O.,**  
822 **Usadel, B., Scheible W.-R. and Stitt, M.** (2005) Sugars and circadian regulation make major  
823 contributions to the global regulation of diurnal gene expression in *Arabidopsis*. *The Plant Cell*,  
824 17, 3257–3281. DOI: 10.1105/tpc.105.035261
- 825 **Bulley, S.M., Rassam, M., Hoser, D., Otto, W., Schünemann, N., Wright, M., MacRae, E.,**  
826 **Gleave, A. and Laing, W.** (2009) Gene expression studies in kiwifruit and gene over-expression  
827 in *Arabidopsis* indicates that GDP-L-galactose guanyltransferase is a major control point of  
828 vitamin C biosynthesis. *J. Exp. Bot.*, 60, 765–778.
- 829 **Bulley, S. and Laing, W.** (2016). The regulation of ascorbate biosynthesis. *Curr. Opin. Plant*  
830 *Biol.* 33: 15–22.
- 831 **Bulley, S.M., Cooney, J.M. and Laing, W.** (2021) Elevating Ascorbate in *Arabidopsis*  
832 Stimulates the Production of Abscisic Acid, Phaseic Acid, and to a Lesser Extent Auxin (IAA)  
833 and Jasmonates, Resulting in Increased Expression of DHAR1 and Multiple Transcription

834 Factors Associated with Abiotic Stress Tolerance. *International Journal of Molecular Sciences*,  
835 22, #6743. DOI: 10.3390/ijms22136743

836 **Burns, J.J.** (1957) Missing Step in Man, Monkey and Guinea Pig required for the Biosynthesis  
837 of L-Ascorbic Acid. *Nature*, 180, 553–553.

838 **Christie, J.M.** (2007). Phototropin blue-light receptors. *Annu. Rev. Plant Biol.* **58**: 21–45.

839 **Christie, J.M., Swartz, T.E., Bogomolni, R.A., and Briggs, W.R.** (2002). Phototropin LOV  
840 domains exhibit distinct roles in regulating photoreceptor function. *Plant J.* **32**: 205–219.

841 **Christie, J.M., Blackwood, L., Petersen, J., Sullivan, S.** (2015) Plant Flavoprotein  
842 Photoreceptors. *Plant and Cell Physiology*, 56, 401-413. DOI: 10.1093/pcp/pcu196

843 **Conklin, P.L., Gatzek, S., Wheeler, G.L., Dowdle, J., Raymond, M.J., Rolinski, S., Isupov,**  
844 **M., Littlechild, J.A. and Smirnoff, N.** (2006) Arabidopsis thaliana VTC4 Encodes L-Galactose-  
845 1-P Phosphatase, a Plant Ascorbic Acid Biosynthetic Enzyme. *J. Biol. Chem.*, 281, 15662–15670

846 **Conklin, P.L., Norris, S.R., Wheeler, G.L., Williams, E.H., Smirnoff, N. and Last, R.L.**  
847 (1999) Genetic evidence for the role of GDP-D-mannose in plant ascorbic acid (vitamin C)  
848 biosynthesis. *Proc. Natl. Acad. Sci.*, 96, 4198–4203.

849 **Crosson, S., Rajagopal, S. and Moffat, K.** (2003) The LOV Domain Family: Photoresponsive  
850 Signaling Modules Coupled to Diverse Output Domains †. *Biochemistry*, 42, 2–10.

851 **Deslous, P., Bournonville, C., Decros, G., Okabe, Y., Mauxion, J.-P., Jorly, J., Gadin, S.,**  
852 **Brès, C., Mori, K., Ferrand, C., Prigent, S., Ariizumi, T., Ezura, H., Hernould, M., Rothan,**  
853 **C., Pétriacq, P., Gibon, Y., Baldet, P.** (2021) Overproduction of ascorbic acid impairs pollen  
854 fertility in tomato. *Journal of Experimental Botany*, 72, 3091-3107. DOI: 10.1093/jxb/erab040

855 **Dowdle, J., Ishikawa, T., Gatzek, S., Rolinski, S. and Smirnoff, N.** (2007) Two genes in  
856 Arabidopsis thaliana encoding GDP-L-galactose phosphorylase are required for ascorbate  
857 biosynthesis and seedling viability. *Plant J.*, 52, 673–689

858 **Fausser, F., Schiml, S. and Puchta, H.** (2014) Both CRISPR/Cas-based nucleases and nickases  
859 can be used efficiently for genome engineering in Arabidopsis thaliana. *Plant J.*, 79, 348–359

860 **Fenech, M., Amorim-Silva, V., del Valle, A.E., Arnaud, D., Ruiz-Lopez, N., Castillo, A.G.,**  
861 **Smirnoff, N., Botella, M.A.** (2021) The role of GDP-L-galactose phosphorylase in the control of  
862 ascorbate biosynthesis. *Plant Physiology*, 185, 1574-1594. DOI: 10.1093/plphys/kiab010

863 **Fernandez AI, Viron N, Alhag Dow M, et al.** (2009) Flexible tools for gene expression and  
864 silencing in tomato. *Plant Physiology* 151, 1729–1740.

- 865 **Garcia, V., Bres, C., Just, D., et al.** (2016) Rapid identification of causal mutations in tomato  
866 EMS populations via mapping-by-sequencing. *Nat. Protoc.*, 11, 2401–2418
- 867 **Gatzek, S., Wheeler, G.L. and Smirnoff, N.** (2002) Antisense suppression of L-galactose  
868 dehydrogenase in *Arabidopsis thaliana* provides evidence for its role in ascorbate synthesis and  
869 reveals light modulated L-galactose synthesis. *Plant J.*, 30, 541–553
- 870 **Gautier, H., Diakou-Verdin, V., Bénard, C., Reich, M., Buret, M., Bourgaud, F., Poëssel,**  
871 **J.L., Caris-Veyrat, C. and Génard, M.** (2008) How Does Tomato Quality (Sugar, Acid, and  
872 Nutritional Quality) Vary with Ripening Stage, Temperature, and Irradiance? *J. Agric. Food*  
873 *Chem.*, 56, 1241–1250
- 874 **Gautier, H., Massot, C., Stevens, R., Sérino, S. and Génard, M.** (2009) Regulation of tomato  
875 fruit ascorbate content is more highly dependent on fruit irradiance than leaf irradiance. *Ann.*  
876 *Bot.*, 103, 495–504
- 877 **Gest, N., Gautier, H. and Stevens, R.** 2013. Ascorbate as seen through plant evolution: the rise  
878 of a successful molecule? *Journal of Experimental Botany* 64: 33–53. DOI: 10.1093/jxb/ers297
- 879 **Hackbusch, J., Richter, K., Muller, J., Salamini, F. and Uhrig, J.F.** (2005) A central role of  
880 *Arabidopsis thaliana* ovate family proteins in networking and subcellular localization of 3-aa loop  
881 extension homeodomain proteins. *Proc. Natl. Acad. Sci.*, 102, 4908–4912.
- 882 **Huche-Thelier, L., Crespel, L., Le Gourrierc, J., Morel, P., Sakr, S., Leduc, N.** (2016) Light  
883 signaling and plant responses to blue and UV radiations-Perspectives for applications in  
884 horticulture. *Environmental and Experimental Botany*, 121, 22-38. DOI:  
885 10.1016/j.envexpbot.2015.06.009
- 886 **Just, D., Garcia, V., Fernandez, L., et al.** (2013) Micro-Tom mutants for functional analysis of  
887 target genes and discovery of new alleles in tomato. *Plant Biotechnol.*, 30, 225–231
- 888 **Käll L., Canterbury J., Weston J., Noble W.S. and MacCoss M.J.** (2007) Semi-supervised  
889 learning for peptide identification from shotgun proteomics datasets, *Nature Methods* 4:923 – 925
- 890 **Kasahara, M., Swartz, T.E., Olney, M.A., Onodera, A., Mochizuki, N., Fukuzawa, H.,**  
891 **Asamizu, E., Tabata, S., Kanegae, H., Takano, M., Christie, J.M., Nagatani, A., Briggs,**  
892 **W.R.** (2002) Photochemical properties of the flavin mononucleotide-binding domains of the  
893 phototropins from *Arabidopsis*, rice, and *Chlamydomonas reinhardtii*. *Plant Physiology*, 129,  
894 762-773. DOI: 10.1104/pp.002410



- 895 **Kasahara, M., Torii, M., Fujita, A. and Tainaka, K.** (2010) FMN Binding and Photochemical  
896 Properties of Plant Putative Photoreceptors Containing Two LOV Domains, LOV/LOV Proteins.  
897 *J. Biol. Chem.*, 285, 34765–34772
- 898 **Kobayashi, M., Nagasaki, H., Garcia, V., et al.** (2014) Genome-Wide Analysis of Intraspecific  
899 DNA Polymorphism in ‘Micro-Tom’, a Model Cultivar of Tomato (*Solanum lycopersicum*).  
900 *Plant Cell Physiol.*, 55, 445–454
- 901 **Krauss, U., Minh, B.Q., Losi, A., Gartner, W., Eggert, T., von Haeseler, A., Jaeger, K.E.**  
902 **(2009)** Distribution and Phylogeny of Light-Oxygen-Voltage-Blue-Light-Signaling Proteins in  
903 the Three Kingdoms of Life. *Journal of Bacteriology*, 23, 7234-7242. DOI: 10.1128/JB.00923-09
- 904 **Laemmli, U.K.** (1970), Cleavage of structural proteins during the assembly of the head of  
905 bacteriophage T4 *Nature*, 227 pp. 680-685
- 906 **Laing, W.A., Martinez-Sanchez, M., Wright, M.A., et al.** (2015) An upstream open reading  
907 frame is essential for feedback regulation of ascorbate biosynthesis in *Arabidopsis*. *Plant Cell*,  
908 27, 772–786
- 909 **Lei, Y., Lu, L., Liu, H.-Y., Li, S., Xing, F. and Chen, L.-L.** (2014) CRISPR-P: A Web Tool for  
910 Synthetic Single-Guide RNA Design of CRISPR-System in Plants. *Mol. Plant*, 7, 1494–1496
- 911 **Li, H., Handsaker, B., Wysoker, A., Fennell, T., Ruan, J., Homer, N., Marth, G., Abecasis,**  
912 **G. and Durbin, R.** (2009) The Sequence Alignment/Map format and SAMtools. *Bioinformatics*,  
913 25, 2078–2079
- 914 **Li, J., Liang, D., Li, M. and Ma, F.** (2013) Light and abiotic stresses regulate the expression of  
915 GDP-L-galactose phosphorylase and levels of ascorbic acid in two kiwifruit genotypes via light-  
916 responsive and stress-inducible cis-elements in their promoters. *Planta*, 238, 535–547.
- 917 **Li, Y., Zhang, Y., Li, M., Luo, Q., Mallano, A.I., Jing, Y., Zhang, Y., Zhao, L. and Li, W.**  
918 **(2018)** GmPLP1 , a PAS/LOV protein, functions as a possible new type of blue light  
919 photoreceptor in soybean. *Gene*, 645, 170–178
- 920 **Linster, C.L. and Clarke, S.G.** (2008) L-Ascorbate biosynthesis in higher plants: the role of  
921 VTC2. *Trends Plant Sci.*, 13, 567–73
- 922 **Linster, C.L., Gomez, T.A., Christensen, K.C., Adler, L.N., Young, B.D., Brenner, C. and**  
923 **Clarke, S.G.** (2007) *Arabidopsis* VTC2 Encodes a GDP-L-Galactose Phosphorylase, the Last  
924 Unknown Enzyme in the Smirnoff-Wheeler Pathway to Ascorbic Acid in Plants. *J. Biol. Chem.*,  
925 282, 18879–18885

- 926 **Linster, C.L., Adler, L.N., Webb, K., Christensen, K.C., Brenner, C. and Clarke, S.G.**  
927 (2008) A second GDP-L-galactose phosphorylase in Arabidopsis en route to vitamin C. Covalent  
928 intermediate and substrate requirements for the conserved reaction. *Journal of Biological*  
929 *Chemistry*, 283, 18483-18492.
- 930 **Losi, A. and Gartner, W.** (2012) The Evolution of Flavin-Binding Photoreceptors: An Ancient  
931 Chromophore Serving Trendy Blue-Light Sensors. *Annual Review of Plant Biology*, 63, 49-72.  
932 DOI: 10.1146/annurev-arplant-042811-105538
- 933 **Mach, J.** (2013) COP9 Signalosome-Regulated Proteolysis: Turning Off Ascorbic Acid  
934 Synthesis When the Lights Go Out. *Plant Cell*, 25, 359–359
- 935 **Massot, C., Stevens, R., Génard, M., Longuenesse, J.-J. and Gautier, H.** (2012) Light affects  
936 ascorbate content and ascorbate-related gene expression in tomato leaves more than in fruits.  
937 *Planta*, 235, 153–163
- 938 **Moglich, A., Yang, X.J., Ayers, R.A. and Moffat, K.** (2010) Structure and Function of Plant  
939 Photoreceptors. *Annual Review of Plant Biology*, 61, 21-47. DOI: 10.1146/annurev-arplant-  
940 042809-112259
- 941 **Müller-Moulé, P.** (2008). An expression analysis of the ascorbate biosynthesis enzyme VTC2.  
942 *Plant Mol. Biol.*, 68, 31–41.
- 943 **Müller K, Engesser R, Schulz S, Steinberg T, Tomakidi P, Weber CC, et al.** (2013) Multi-  
944 chromatic control of mammalian gene expression and signaling. *Nucleic Acids Res.*; 41: e124.  
945 doi: 10.1093/nar/ gkt340 PMID: 23625964
- 946 **Müller, K., Siegel, D., Rodriguez Jahnke, F., Gerrer, K., Wend, S., Decker, E.L., Reski, R.,**  
947 **Weber, W. and Zurbriggen, M.D.** (2014) A red light-controlled synthetic gene expression  
948 switch for plant systems. *Mol. Biosyst.*, 10, 1679–88
- 949 **Nosaki S, Kaneko MK, Tsuruta F, Yoshida H, Kato Y, Miura K.** (2021) Prevention of  
950 necrosis caused by transient expression in *Nicotiana benthamiana* by application of ascorbic acid.  
951 *Plant Physiol* 186: 832–835
- 952 **Ogura, Y., Komatsu, A., Zikihara, K., Nanjo, T., Tokutomi, S., Wada, M. and Kiyosue, T.**  
953 (2008) Blue light diminishes interaction of PAS/LOV proteins, putative blue light receptors in  
954 *Arabidopsis thaliana*, with their interacting partners. *J. Plant Res.*, 121, 97–105
- 955 **Rothan, C., Just, D., Fernandez, L., Atienza, I., Ballias, P. and Lemaire-Chamley, M.** (2016)  
956 Culture of the Tomato Micro-Tom Cultivar in Greenhouse. In J. R. Botella and M. A. Botella,  
34

- 957 eds. *Plant Signal Transduction: Methods and Protocols*. New York, NY: Springer New York, pp.  
958 57–64
- 959 **Smith, S.M. and Maughan, P.J.** (2015) SNP genotyping using KASPar assays. *Methods Mol.*  
960 *Biol.*, 1245, 243—256
- 961 **Szymanski, J. Levin, Y., Savidor, A., Breitel, D., Chappell-Maor, L., Heinig, U., Töpfer, N.**  
962 **and Aharoni, A.** (2017) Label-free deep shotgun proteomics reveals protein dynamics during  
963 tomato fruit tissues development. *The Plant Journal*, 90, 396-417. DOI: 10.1111/tpj.13490
- 964 **Tabata, K., Takaoka, T. and Esaka, M.** (2002) Gene expression of ascorbic acid-related  
965 enzymes in tobacco. *Phytochemistry*, 61, 631–635.
- 966 **Truffault, V. Fry, S.C. Stevens, R.G., Gautier, H.** (2017) Ascorbate degradation in tomato  
967 leads to accumulation of oxalate, threonate and oxalyl threonate. *The Plant Journal*, 89, 996-  
968 1008. DOI: 10.1111/tpj.13439
- 969 **Uhrig, R.G., Echevarría-Zomeño, S., Schlapfer, P., Grossmann, J., Roschitzki, B., Koerber,**  
970 **N. et al.** (2021) Diurnal dynamics of the arabidopsis rosette proteome and phosphoproteome.  
971 *Plant, Cell & Environment*, 44, 821– 841
- 972 **Walter, M., Chaban, C., Schütze, K., et al.** (2004) Visualization of protein interactions in living  
973 plant cells using bimolecular fluorescence complementation. *Plant J.*, 40, 428–438
- 974 **Wang, J., Yu, Y., Zhang, Z., Quan, R., Zhang, H., Ma, L., Deng, X.W. and Huang, R.** (2013)  
975 Arabidopsis CSN5B Interacts with VTC1 and Modulates Ascorbic Acid Synthesis. *Plant Cell*,  
976 25, 625–636
- 977 **Wheeler, G., Ishikawa, T., Pornsaksit, V. and Smirnoff, N.** (2015) Evolution of alternative  
978 biosynthetic pathways for vitamin C following plastid acquisition in photosynthetic eukaryotes.  
979 *Elife*, 2015, 1–25.
- 980 **Wheeler, G.L., Jones, M. and Smirnoff, N.** (1998) vitamin C in higher plants. *Nature*, 393,  
981 365–369.
- 982 **Yamamoto T, Hoshikawa K, Ezura K, Okazawa R, Fujita S, Takaoka M, Mason HS, Ezura**  
983 **H, Miura K.** (2018) Improvement of the transient expression system for production of  
984 recombinant proteins in plants. *Sci Rep* 8: 4755
- 985 **Yasuhara, M., Mitsui, S., Hirano, H., Takanabe, R., Tokioka, Y., Ihara, N., Komatsu, A.,**  
986 **Seki, M., Shinozaki, K. and Kiyosue, T.** (2004) Identification of ASK and clock-associated

987 proteins as molecular partners of LKP2 (LOV kelch protein 2) in Arabidopsis. *Journal of*  
988 *Experimental Botany*, 55, 2015–2027. DOI: 10.1093/jxb/erh226

989 **Yoshimura, K., Nakane, T., Kume, S., Shiomi, Y., Maruta, T., Ishikawa, T. and Shigeoka,**  
990 **S. (2014)** Transient expression analysis revealed the importance of VTC2 expression level in  
991 light/dark regulation of ascorbate biosynthesis in Arabidopsis. *Bioscience, Biotechnology and*  
992 *Biochemistry*, 78, 60-66. DOI: 10.1080/09168451.2014.877831

993 **Zhang, W., Lorence, A., Gruszewski, H.A., Chevone, B.I. and Nessler, C.L. (2009)** AMR1,  
994 an Arabidopsis Gene That Coordinately and Negatively Regulates the Mannose/L-Galactose  
995 Ascorbic Acid Biosynthetic Pathway. *Plant Physiol.*, 150, 942–950

996 **Zhang, Z. and Huang, R. (2010)** Enhanced tolerance to freezing in tobacco and tomato  
997 overexpressing transcription factor TERF2/LeERF2 is modulated by ethylene biosynthesis. *Plant*  
998 *Mol. Biol.*, 73, 241–9

999 **Zhang, Z., Wang, J., Zhang, R. and Huang, R. (2012)** The ethylene response factor AtERF98  
1000 enhances tolerance to salt through the transcriptional activation of ascorbic acid synthesis in  
1001 Arabidopsis. *Plant J.*, 71, 273–287.

1002 **Zikihara K, Iwata T, Matsuoka D, Kandori H, Todo T, Tokutomi S (2006)** Photoreaction  
1003 cycle of the Light, Oxygen, and Voltage domain in FKF1 determined by low-temperature  
1004 absorption spectroscopy. *Biochemistry* 45:10828–10837

1005 **Figure Legends**

1006 **Figure 1.** Identification of the mutation responsible for the ascorbate-enriched fruit phenotype.

1007 A. Identification of the chromosome associated with the ascorbate-enriched phenotype. Pattern of  
1008 the mutation allelic frequencies obtained in the mutant and WT-like bulks are represented along  
1009 tomato chromosomes by black and grey lines, respectively. The plot represents allelic frequencies  
1010 ( $y$  axis) against genome positions ( $x$ -axis). A sliding window of 5 SNPs was used. The  $x$ -axis  
1011 displays the 12 tomato chromosomes, the black arrow indicates the peak of allelic frequency (AF)  
1012 of the chromosome 5 region carrying the putative causal mutations, since it displayed an AF >  
1013 0.95 (orange line) in the AsA+ bulk and an AF < 0.4 (grey line) in the WT-like bulk. B. Fine  
1014 mapping of the causal mutation using the BC<sub>1</sub>F<sub>2</sub> population. Recombinant analysis of 44 BC<sub>1</sub>F<sub>2</sub>  
1015 individuals displaying the ascorbate-enriched phenotype allowed us to locate the causal mutation  
1016 at position 1,610,253 nucleotides. Black triangles indicate marker positions. Number of  
1017 recombinants are shown below the position of the markers. Chromosomal constitution of the  
1018 recombinants is represented by black and grey bars, for mutant and heterozygous segment  
1019 respectively. C. A single nucleotide transversion, G to A at position 1,610,253 in the  
1020 Solyc05g007020 fifth exon sequence led to a STOP codon.

1021 **Figure 2.** Validation of PAS/LOV as the candidate gene involved in regulating ascorbate content  
1022 in developing fruit and several tomato plant organs.

1023 A. Schematic representation of *PLP* showing its PAS and LOV domains. The dashed arrow in the  
1024 PAS domain indicates the position of the target sequence for the CRISPR-Cas9 construct. B.  
1025 Ascorbate in red ripe fruit (means  $\pm$  SD, n=4) of WT, T0 line 15 and progeny T1 lines 15-1 and  
1026 15-4. C. Ascorbate content in fruit of WT and *plp* mutant plants during development, from  
1027 anthesis to ripeness. D. Ascorbate content in flowers, leaves at 3 stage of development, stem and  
1028 roots of the 15-5 line and control one-month-old plants. Data are the means  $\pm$  SD of a total of  
1029 three individual plants per organ and three organs per plant, except for anthesis (100 organs) and  
1030 at 4 DPA (20 organs). Abbreviations: PLP, PAS/LOV; DPA, days post-anthesis; Br, breaker  
1031 stage; FI, flowers; YL, young leaf; ML, mature leaf; OL, old leaf; St, stem; R, roots.

1032  
1033 **Figure 3.** Changes in ascorbate and GDP-L-galactose phosphorylase and PAS/LOV mRNA  
1034 during a day and night cycle in *plp* mutant and WT plants.

1035 *plp* mutant (T2 line 15-5) and WT plants were cultured in the greenhouse for 1 month. The night  
1036 before the beginning of the experiment, all plants were moved outside and maintained under  
1037 natural light conditions during 32 hours. This experiment was carried out twice, on May 19<sup>th</sup> and  
1038 July 10<sup>th</sup> 2018, they both lead remarkably to the same results. Here is presented the data obtained  
1039 on July 10<sup>th</sup>. A. Ambient temperature (diamonds) and light intensity (bars). B. Ascorbate content.  
1040 C. *PLP* mRNA abundance. D. *GGPI* mRNA abundance. Data are expressed as means  $\pm$  SD of a  
1041 total three mature leaves from three individual plants from the 15-5 *plp* line and WT control.

1042  
1043 **Figure 4.** Subcellular localization of PAS/LOV and GDP-L-galactose phosphorylase and their  
1044 interaction.

1045 A. Localization of 35S-GFP-fused proteins in *Nicotiana benthamiana* leaves, co-transformed  
1046 with nuclear NLS-mcherry as nuclear marker. B. Analysis of PLP-GGP1/2 interactions and its  
1047 light dependency in a heterologous mammalian split transcription factor system. 50 000 HEK-  
1048 293T cells were seeded in 24-wells plates and transfected after 24 h with the plasmids pMZ1214,  
1049 pMZ1215, pMZ1216, pMZ1217, pMZ1218, pMZ1219, pMZ1240, pMZ1241, pSAM, pRSET  
1050 and pKM006. Twenty-four hours post transfection, the medium was exchanged by fresh medium  
1051 and the cells were illuminated at 455 nm light ( $10 \mu\text{mol m}^{-2}\text{s}^{-1}$ ) or kept in the dark for 24 h prior  
1052 to SEAP quantification Data are represented as means  $\pm$  SD (n=4). Abbreviations: HEK-293T,  
1053 human embryonic kidney cells; SEAP, secreted alkaline phosphatase.

1054  
1055 **Figure 5.** Effect of light on ascorbate evolution in WT and *plp* mutant leaves during a day-night  
1056 cycle.

1057 A. In leaves of plants grown in a greenhouse then transferred to a growth chamber under a white  
1058 light intensity of  $260\text{-}270 \mu\text{mol.m}^{-2}\text{s}^{-1}$  for 24 hours. B. Following cycle, still under white light. C.  
1059 Following cycle under blue light. D. Following cycle under red light. E. Following cycle under  
1060 blue (50%) and red (40%) light. F. Following cycle in the dark. G. Heat map representing a  
1061 clustering analysis performed with mean values in MEV4.9. Columns correspond to time, and  
1062 lines correspond to clustered content of ascorbate based on Pearson's correlation coefficient  
1063 (XXX algorithm?). All data shown in A-F are expressed as means  $\pm$  SD (n=4).

1064

1065 **Figure 6.** *In-vitro* inhibition of GDP-L-galactose phosphorylase by PAS/LOV and effect of blue  
1066 light on PAS/LOV.

1067 A. Relation between the PLP/GGP ratio and the inhibition of GGP. B. Hanes-Woolf plot GDP-L-  
1068 galactose phosphorylase inhibition by PLP. GDP-glucose at concentrations of 12, 30, 60, 120 and  
1069 300  $\mu$ M was used as substrate. C. Effect of blue light exposure duration on GGP inhibition by  
1070 PLP. The light was applied before mixing the two proteins. All data shown are expressed as  
1071 means  $\pm$  SD (n=2 technical duplicates).

1072  
1073 **Figure 7.** Schematic model describing the activation of ascorbate synthesis by blue light.

1074 Newly synthesized PAS/LOV protein binds GDP-L-galactose phosphorylase unless deactivated  
1075 by blue light. Its deactivated form is stable for several hours while its active form irreversibly  
1076 inhibits its target, possibly leading to its degradation. Abbreviations: PLP, PAS/LOV; GGP,  
1077 GDP-L-galactose phosphorylase.

1078

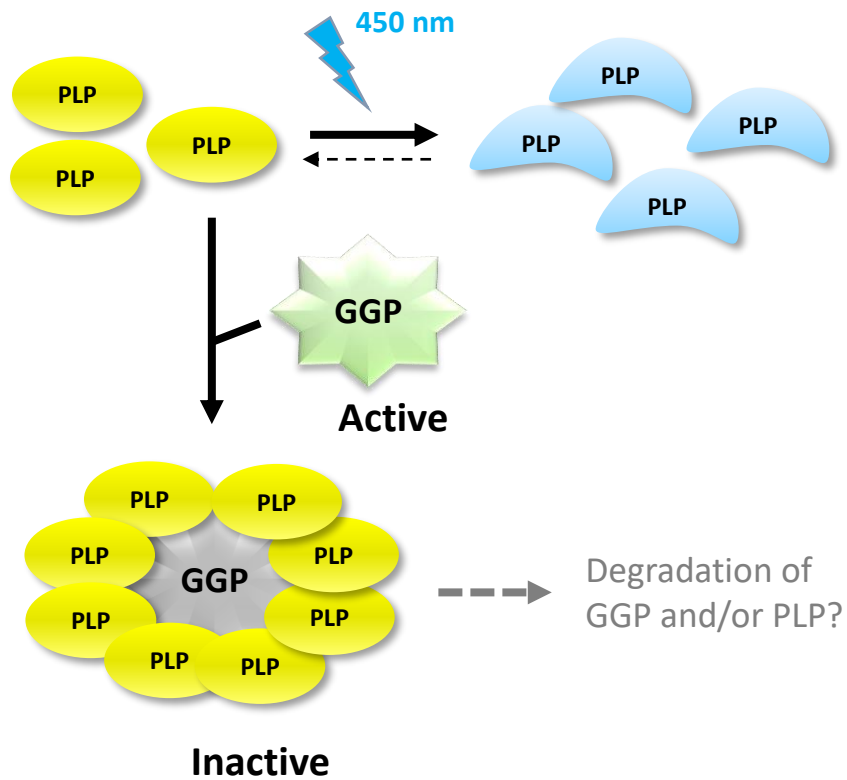

**Figure 7. Schematic model describing the activation of ascorbate synthesis by blue light.** Newly synthesized PAS/LOV protein binds GDP-L-galactose phosphorylase unless deactivated by blue light. Its deactivated form is stable for several hours while its active form irreversibly inhibits its target, possibly leading to its degradation. Abbreviations: PLP, PAS/LOV; GGP, GDP-L-galactose phosphorylase.



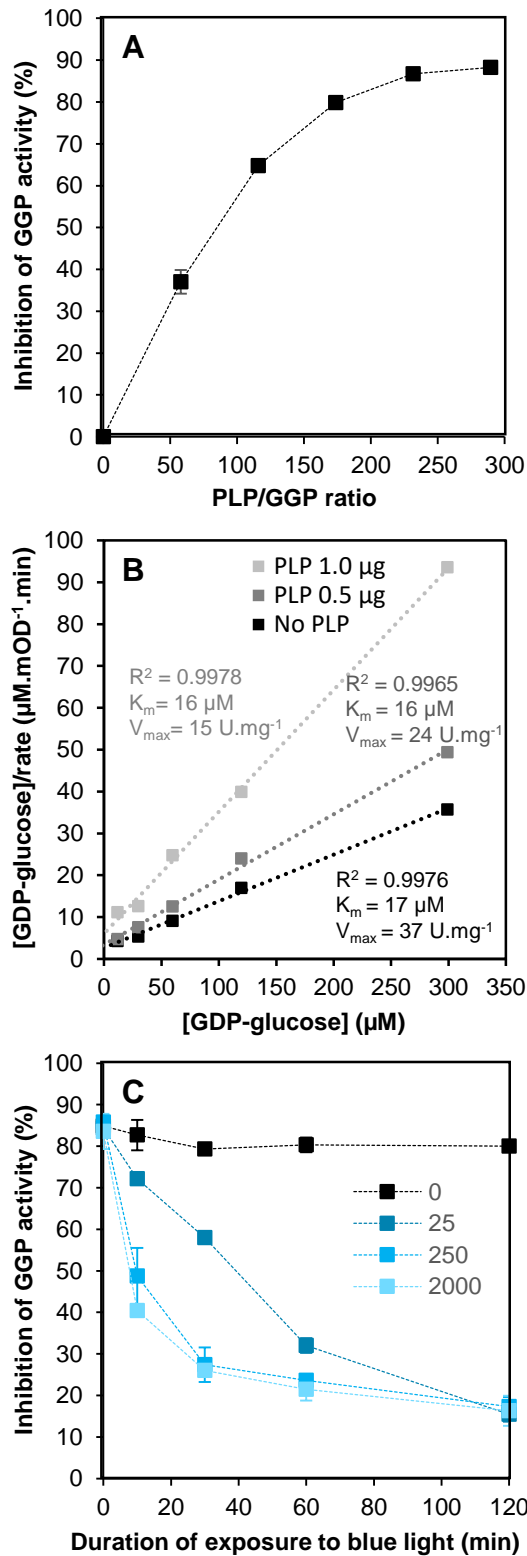

**Figure 6.** *In-vitro* inhibition of GDP-L-galactose phosphorylase by PAS/LOV and effect of blue light on PAS/LOV. **A.** Relation between the PLP/GGP ratio and the inhibition of GGP. **B.** Hanes-Woolf plot GDP-L-galactose phosphorylase inhibition by PLP. GDP-glucose at concentrations of 12, 30, 60, 120 and 300  $\mu\text{M}$  was used as substrate. **C.** Effect of blue light exposure duration on GGP inhibition by PLP. The light was applied before mixing the two proteins. All data shown are expressed as means  $\pm$  SD (n=2 technical duplicates).

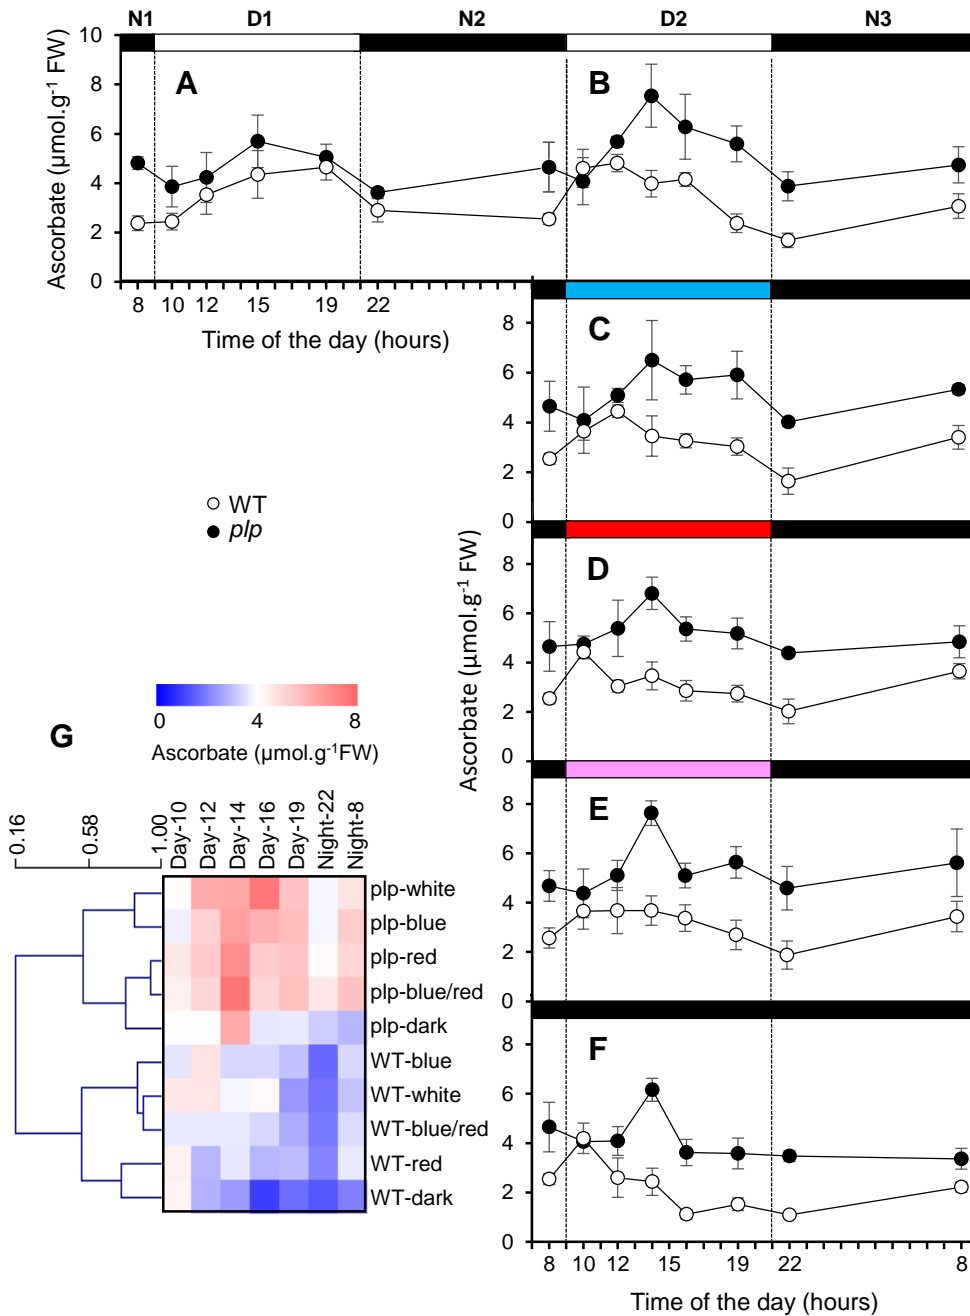

**Figure 5. Effect of light on ascorbate evolution in WT and *plp* mutant leaves during a day-night cycle. A.** In leaves of plants grown in a greenhouse then transferred to a growth chamber under a white light intensity of 260-270  $\mu\text{mol}\cdot\text{m}^{-2}\cdot\text{s}^{-1}$  for 24 hours. **B.** Following cycle, still under white light. **C.** Following cycle under blue light. **D.** Following cycle under red light. **E.** Following cycle under blue (50%) and red light (40%). **F.** Following cycle in the dark. **G.** Heat map representing a clustering analysis performed with mean values in MEV4.9. Columns correspond to time and lines correspond to clustered content of ascorbate based on Pearson correlation coefficient. All data shown in A-F are expressed as means  $\pm$  SD ( $n=4$ ).

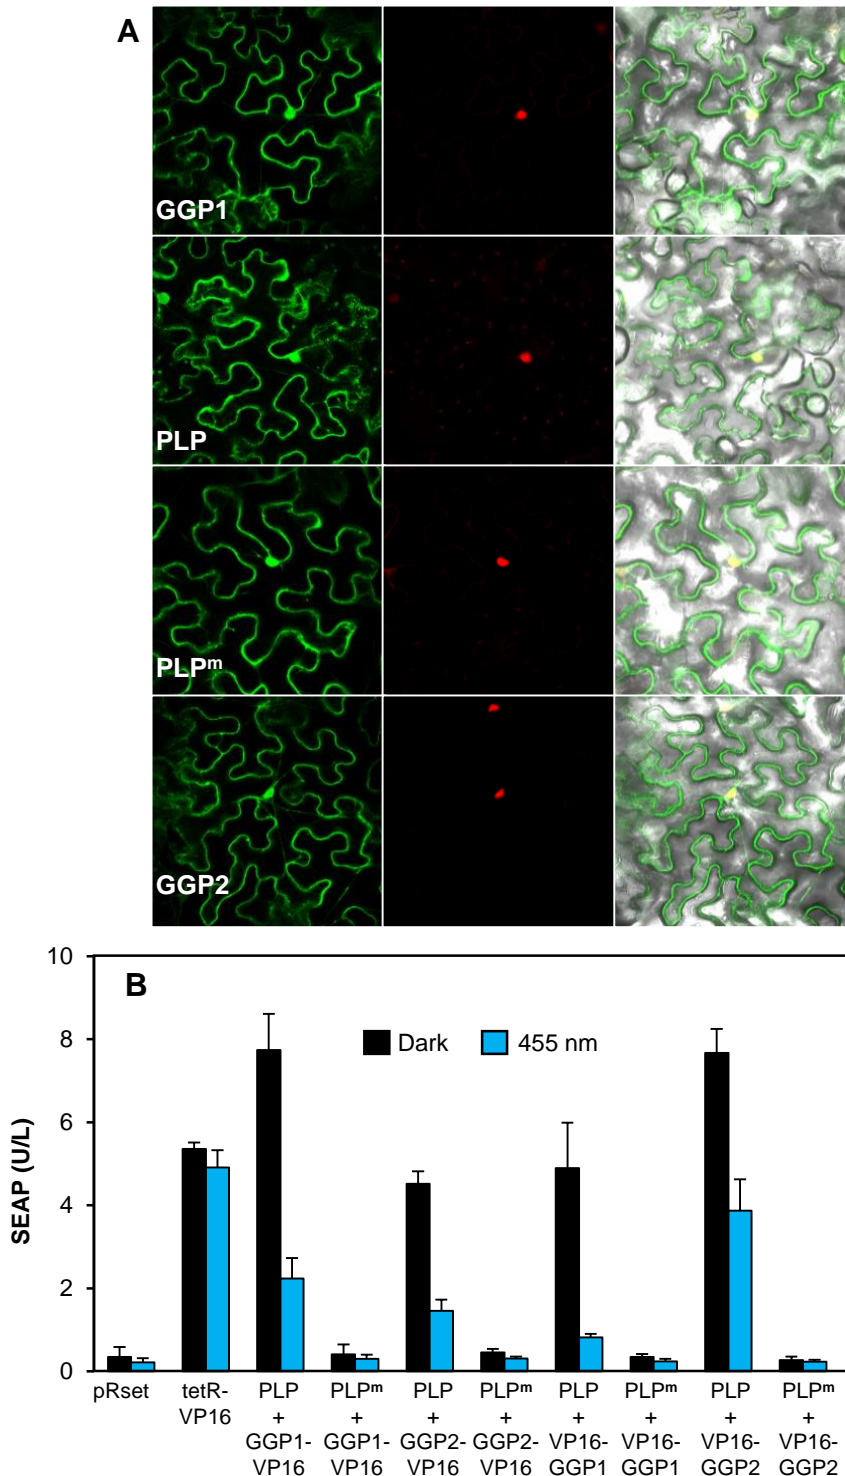

**Figure 4. Subcellular localization of PAS/LOV and GDP-L-galactose phosphorylase and their interaction. A.** Localization of 35S-GFP-fused proteins in *Nicotiana benthamiana* leaves, co-transformed with nuclear NLS-mcherry as nuclear marker. **B.** Analysis of PLP-GGP1/2 interactions and its light dependency in a heterologous mammalian split transcription factor system. 50 000 HEK-293T cells were seeded in 24-wells plates and transfected after 24 h with the plasmids pMZ1214, pMZ1215, pMZ1216, pMZ1217, pMZ1218, pMZ1219, pMZ1240, pMZ1241, pSAM, pRSET and pKM006. Twenty-four hours post transfection, the medium was exchanged by fresh medium and the cells were illuminated at 455 nm light ( $10 \mu\text{mol m}^{-2}\text{s}^{-1}$ ) or kept in the dark for 24 h prior to SEAP quantification. Data are represented as means  $\pm$  SD (n=4). Abbreviations: HEK-293T, human embryonic kidney cells; SEAP, secreted alkaline phosphatase .

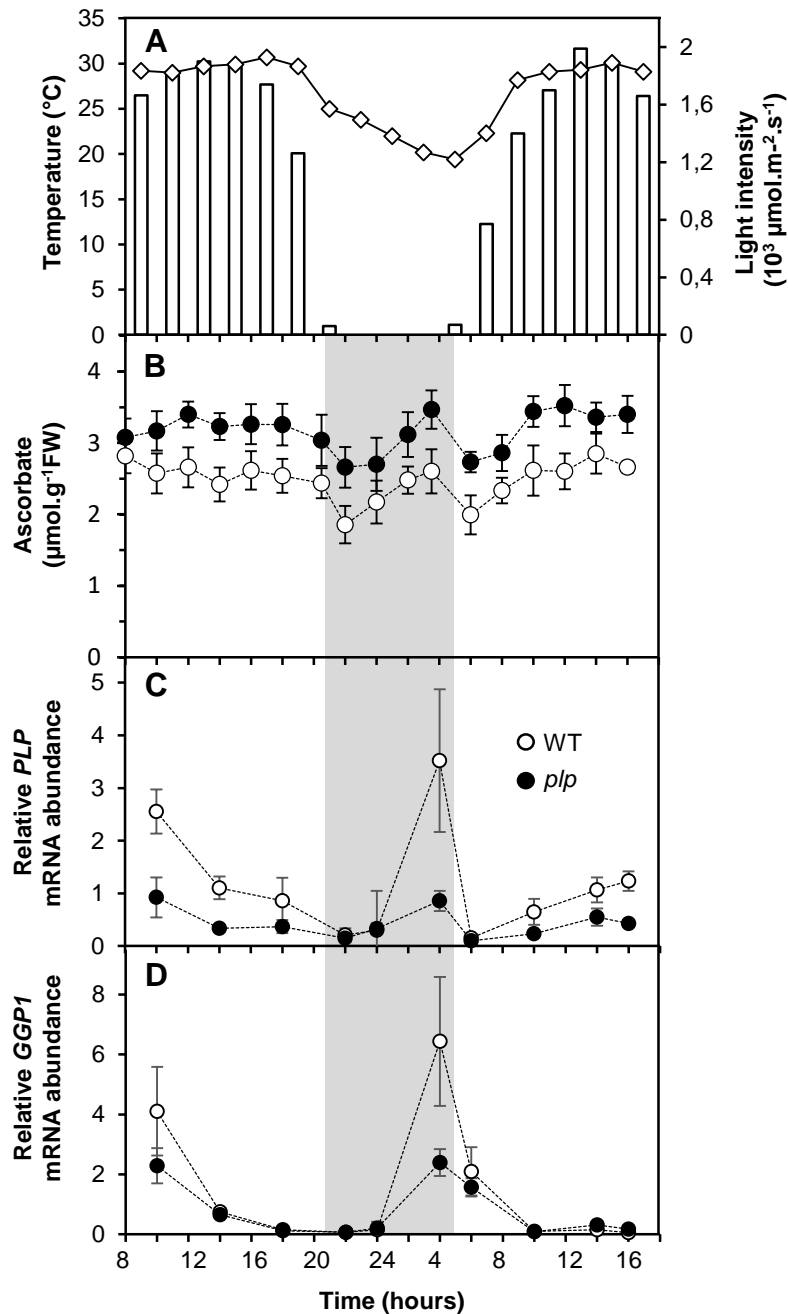

**Figure 3. Changes in ascorbate and GDP-L-galactose phosphorylase and PAS/LOV mRNA during a day and night cycle in *plp* mutant and WT plants.** *plp* mutant (T2 line 15-5) and WT plants were cultured in the greenhouse for 1 month. The night before the beginning of the experiment, all plants were moved outside and maintained under natural light conditions during 32 hours. This experiment was carried out twice, on May 19<sup>th</sup> and July 10<sup>th</sup> 2018, they both lead remarkably to the same results. Here is presented the data obtained on July 10<sup>th</sup>. **A.** Ambient temperature (diamonds) and light intensity (bars). **B.** Ascorbate content. **C.** *PLP* mRNA abundance. **D.** *GGP1* mRNA abundance. Data are expressed as means  $\pm$  SD of a total three mature leaves from three individual plants from the 15-5 *plp* line and WT control.

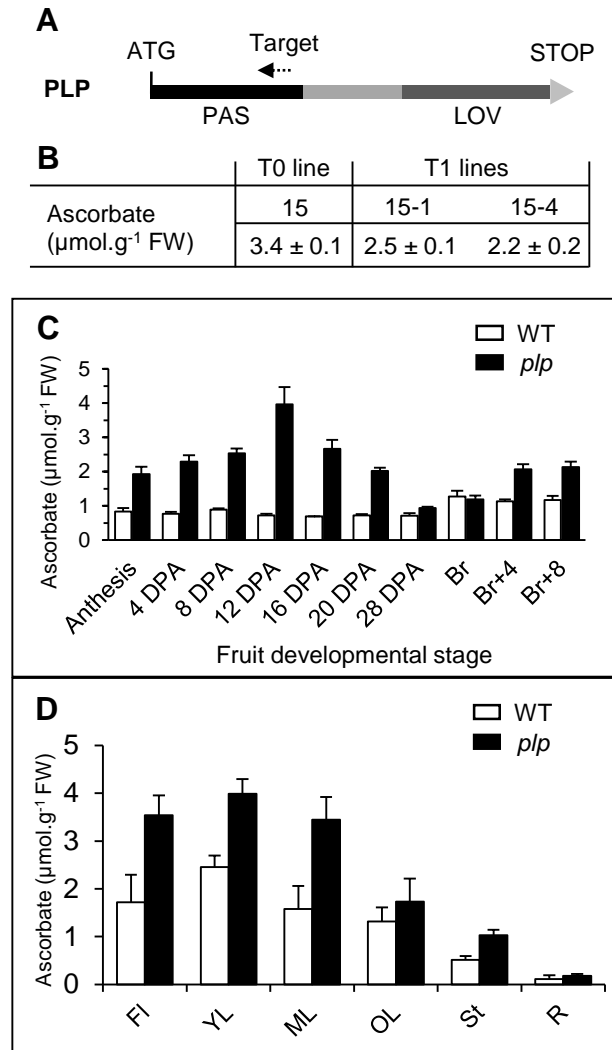

**Figure 2. Validation of PAS/LOV as the candidate gene involved in regulating ascorbate content in developing fruit and several tomato plant organs.** **A.** Schematic representation of PLP showing its PAS and LOV domains. The dashed arrow in the PAS domain indicates the position of the target sequence for the CRISPR-Cas9 construct. **B.** Ascorbate in red ripe fruit (means  $\pm$  SD,  $n=4$ ) of WT, T0 line 15 and progeny T1 lines 15-1 and 15-4. **C.** Ascorbate content in fruit of WT and *plp* mutant plants during development, from anthesis to ripeness. **D.** Ascorbate content in flowers, leaves at 3 stage of development, stem and roots of the 15-5 line and control one month-old plants. Data are the means  $\pm$  SD of a total of three individual plants per organs and three organs per plant, except for anthesis (100 organs) and at 4 DPA (20 organs). Abbreviations: PLP, PAS/LOV; DPA, days post-anthesis; Br, breaker stage; FI, flowers; YL, young leaf; ML, mature leaf; OL, old leaf; St, stem; R, roots.

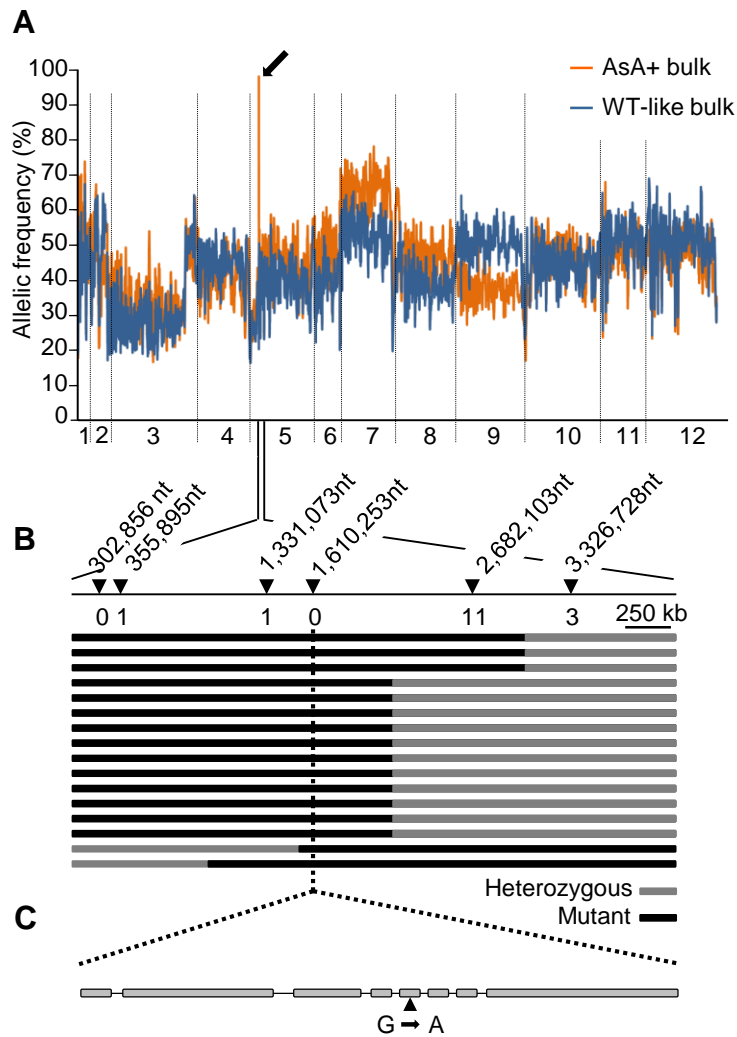

**Figure 1. Identification of the mutation responsible for the ascorbate-enriched fruit phenotype.** **A.** Identification of the chromosome associated with the AsA+ phenotype. Pattern of the mutation allelic frequencies obtained in the mutant and WT-like bulks are represented along tomato chromosomes by black and grey lines, respectively. The plot represents allelic frequencies (y axis) against genome positions (x axis). A sliding window of 5 SNPs was used. The x axis displays the 12 tomato chromosomes, the black arrow indicates the peak of allelic frequency (AF) of the chromosome 5 region carrying the putative causal mutations, since it displayed an AF > 0.95 (orange line) in the AsA+ bulk and an AF < 0.4 (grey line) in the WT-like bulk. **B.** Fine mapping of the causal mutation using the BC<sub>1</sub>F<sub>2</sub> population. Recombinant analysis of 44 BC<sub>1</sub>F<sub>2</sub> individuals displaying the ascorbate-enriched phenotype allowed us to locate the causal mutation at position 1,610,253 nucleotides. Marker positions are indicated by black triangles. Number of recombinants are shown below the position of the markers. Chromosomal constitution of the recombinants is represented by black and grey bars, for mutant and heterozygous segment respectively. **C.** A single nucleotide transversion, G to A at position 1,610,253 in the Solyc05g007020 fifth exon sequence led to a STOP codon.

## Parsed Citations

- Alimohammadi, M., Silva, K. de, Ballu, C., Ali, N. and Khodakovskaya, M. V. (2012) Reduction of inositol (1,4,5)-trisphosphate affects the overall phosphoinositol pathway and leads to modifications in light signalling and secondary metabolism in tomato plants. *J. Exp. Bot.*, 63, 825–835**  
Google Scholar: [Author Only](#) [Title Only](#) [Author and Title](#)
- Bartoli, C.G., Tambussi, E.A., Diego, F. and Foyer, C.H. (2009) Control of ascorbic acid synthesis and accumulation and glutathione by the incident light red/far red ratio in *Phaseolus vulgaris* leaves. *FEBS Lett*, 583, 118–122**  
Google Scholar: [Author Only](#) [Title Only](#) [Author and Title](#)
- Beyer, H. M., Juillot, S., Herbst, K., Samodelov, S. L., Müller, K., Scharmel, W. W., Römer, W., Schäfer, E., Nagy, F., Strähle, U., et al. (2015). Red Light-Regulated Reversible Nuclear Localization of Proteins in Mammalian Cells and Zebrafish. *ACS Synth. Biol.* 4, 951–958.**  
Google Scholar: [Author Only](#) [Title Only](#) [Author and Title](#)
- Belouah, I., Bénard, C., Denton, A., Blein-Nicolas, M., Balliau, T., Teyssier, E., Gallusci, P., Bouchez, O., Usadel, B., Zivy, M., Gibon, Y., Colombié, S. (2020) Transcriptomic and proteomic data in developing tomato fruit. *Data in Brief*, 28, 105015. DOI: 10.1016/j.dib.2019.105015**  
Google Scholar: [Author Only](#) [Title Only](#) [Author and Title](#)
- Bergmeyer, H.U. (1987) Methods of enzymatic analysis. VCH, Weinheim, Germany.**  
Google Scholar: [Author Only](#) [Title Only](#) [Author and Title](#)
- Briggs, W.R. (2001) The Phototropin Family of Photoreceptors. *Plant Cell Online*, 13, 993–997**  
Google Scholar: [Author Only](#) [Title Only](#) [Author and Title](#)
- Bläsing, O.E., Gibon, Y., Günther, M., Höhne, M., Morcuende, R., Osuna, D., Thimm, O., Usadel, B., Scheible W.-R. and Stitt, M. (2005) Sugars and circadian regulation make major contributions to the global regulation of diurnal gene expression in *Arabidopsis*. *The Plant Cell*, 17, 3257-3281. DOI: 10.1105/tpc.105.035261**  
Google Scholar: [Author Only](#) [Title Only](#) [Author and Title](#)
- Bulley, S.M., Rassam, M., Hoser, D., Otto, W., Schünemann, N., Wright, M., MacRae, E., Gleave, A and Laing, W. (2009) Gene expression studies in kiwifruit and gene over-expression in *Arabidopsis* indicates that GDP-L-galactose guanyltransferase is a major control point of vitamin C biosynthesis. *J. Exp. Bot.*, 60, 765–778.**  
Google Scholar: [Author Only](#) [Title Only](#) [Author and Title](#)
- Bulley, S. and Laing, W. (2016). The regulation of ascorbate biosynthesis. *Curr. Opin. Plant Biol.* 33: 15–22.**  
Google Scholar: [Author Only](#) [Title Only](#) [Author and Title](#)
- Bulley, S.M., Cooney, J.M. and Laing, W. (2021) Elevating Ascorbate in *Arabidopsis* Stimulates the Production of Abscisic Acid, Phaseic Acid, and to a Lesser Extent Auxin (IAA) and Jasmonates, Resulting in Increased Expression of DHAR1 and Multiple Transcription Factors Associated with Abiotic Stress Tolerance. *International Journal of Molecular Sciences*, 22, #6743. DOI: 10.3390/ijms22136743**  
Google Scholar: [Author Only](#) [Title Only](#) [Author and Title](#)
- Burns, J.J. (1957) Missing Step in Man, Monkey and Guinea Pig required for the Biosynthesis of L-Ascorbic Acid. *Nature*, 180, 553–553.**  
Google Scholar: [Author Only](#) [Title Only](#) [Author and Title](#)
- Christie, J.M. (2007). Phototropin blue-light receptors. *Annu. Rev. Plant Biol.* 58: 21–45.**  
Google Scholar: [Author Only](#) [Title Only](#) [Author and Title](#)
- Christie, J.M., Swartz, T.E., Bogomolni, R.A., and Briggs, W.R. (2002). Phototropin LOV domains exhibit distinct roles in regulating photoreceptor function. *Plant J.* 32: 205–219.**  
Google Scholar: [Author Only](#) [Title Only](#) [Author and Title](#)
- Christie, J.M., Blackwood, L., Petersen, J., Sullivan, S. (2015) Plant Flavoprotein Photoreceptors. *Plant and Cell Physiology*, 56, 401-413. DOI: 10.1093/pcp/pcu196**  
Google Scholar: [Author Only](#) [Title Only](#) [Author and Title](#)
- Conklin, P.L., Gatzek, S., Wheeler, G.L., Dowdle, J., Raymond, M.J., Rolinski, S., Isupov, M., Littlechild, J.A and Smirnoff, N. (2006) *Arabidopsis thaliana* VTC4 Encodes L-Galactose-1-P Phosphatase, a Plant Ascorbic Acid Biosynthetic Enzyme. *J. Biol. Chem.*, 281, 15662–15670**  
Google Scholar: [Author Only](#) [Title Only](#) [Author and Title](#)
- Conklin, P.L., Norris, S.R., Wheeler, G.L., Williams, E.H., Smirnoff, N. and Last, R.L. (1999) Genetic evidence for the role of GDP-D-mannose in plant ascorbic acid (vitamin C) biosynthesis. *Proc. Natl. Acad. Sci.*, 96, 4198–4203.**  
Google Scholar: [Author Only](#) [Title Only](#) [Author and Title](#)

**Crosson, S., Rajagopal, S. and Moffat, K. (2003) The LOV Domain Family: Photoresponsive Signaling Modules Coupled to Diverse Output Domains †. *Biochemistry*, 42, 2–10.**

Google Scholar: [Author Only](#) [Title Only](#) [Author and Title](#)

**Deslous, P., Bournonville, C., Decros, G., Okabe, Y., Mauxion, J.-P., Jorly, J., Gadin, S., Brès, C., Mori, K., Ferrand, C., Prigent, S., Arizum, T., Ezura, H., Hernould, M., Rothan, C., Pétriacoq, P., Gibon, Y., Baldet, P. (2021) Overproduction of ascorbic acid impairs pollen fertility in tomato. *Journal of Experimental Botany*, 72, 3091-3107. DOI: 10.1093/jxb/erab040**

Google Scholar: [Author Only](#) [Title Only](#) [Author and Title](#)

**Dowdle, J., Ishikawa, T., Gatzek, S., Rolinski, S. and Smirnov, N. (2007) Two genes in *Arabidopsis thaliana* encoding GDP-L-galactose phosphorylase are required for ascorbate biosynthesis and seedling viability. *Plant J.*, 52, 673–689**

Google Scholar: [Author Only](#) [Title Only](#) [Author and Title](#)

**Fausser, F., Schirni, S. and Puchta, H. (2014) Both CRISPR/Cas-based nucleases and nickases can be used efficiently for genome engineering in *Arabidopsis thaliana*. *Plant J.*, 79, 348–359**

Google Scholar: [Author Only](#) [Title Only](#) [Author and Title](#)

**Fenech, M., Amorim-Silva, V., del Valle, A.E., Arnaud, D., Ruiz-Lopez, N., Castillo, A.G., Smirnov, N., Botella, M.A (2021) The role of GDP-L-galactose phosphorylase in the control of ascorbate biosynthesis. *Plant Physiology*, 185, 1574-1594. DOI: 10.1093/plphys/kiab010**

Google Scholar: [Author Only](#) [Title Only](#) [Author and Title](#)

**Fernandez AI, Viron N, Alhaghdow M, et al. (2009) Flexible tools for gene expression and silencing in tomato. *Plant Physiology* 151, 1729–1740.**

Google Scholar: [Author Only](#) [Title Only](#) [Author and Title](#)

**Garcia, V., Bres, C., Just, D., et al. (2016) Rapid identification of causal mutations in tomato EMS populations via mapping-by-sequencing. *Nat. Protoc.*, 11, 2401–2418**

Google Scholar: [Author Only](#) [Title Only](#) [Author and Title](#)

**Gatzek, S., Wheeler, G.L. and Smirnov, N. (2002) Antisense suppression of L-galactose dehydrogenase in *Arabidopsis thaliana* provides evidence for its role in ascorbate synthesis and reveals light modulated L-galactose synthesis. *Plant J.*, 30, 541–553**

Google Scholar: [Author Only](#) [Title Only](#) [Author and Title](#)

**Gautier, H., Diakou-Verdin, V., Bénard, C., Reich, M., Buret, M., Bourgaud, F., Poëssel, J.L., Caris-Veyrat, C. and Génard, M. (2008) How Does Tomato Quality (Sugar, Acid, and Nutritional Quality) Vary with Ripening Stage, Temperature, and Irradiance? *J. Agric. Food Chem.*, 56, 1241–1250**

Google Scholar: [Author Only](#) [Title Only](#) [Author and Title](#)

**Gautier, H., Massot, C., Stevens, R., Sérino, S. and Génard, M. (2009) Regulation of tomato fruit ascorbate content is more highly dependent on fruit irradiance than leaf irradiance. *Ann. Bot.*, 103, 495–504**

Google Scholar: [Author Only](#) [Title Only](#) [Author and Title](#)

**Gest, N., Gautier, H. and Stevens, R. 2013. Ascorbate as seen through plant evolution: the rise of a successful molecule? *Journal of Experimental Botany* 64: 33–53. DOI: 10.1093/jxb/ers297**

Google Scholar: [Author Only](#) [Title Only](#) [Author and Title](#)

**Hackbusch, J., Richter, K., Muller, J., Salamini, F. and Uhrig, J.F. (2005) A central role of *Arabidopsis thaliana* ovate family proteins in networking and subcellular localization of 3-aa loop extension homeodomain proteins. *Proc. Natl. Acad. Sci.*, 102, 4908–4912.**

Google Scholar: [Author Only](#) [Title Only](#) [Author and Title](#)

**Huche-Thelie, L., Crespel, L., Le Gourrierec, J., Morel, P., Sakr, S., Leduc, N. (2016) Light signaling and plant responses to blue and UV radiations-Perspectives for applications in horticulture. *Environmental and Experimental Botany*, 121, 22-38. DOI: 10.1016/j.envexpbot.2015.06.009**

Google Scholar: [Author Only](#) [Title Only](#) [Author and Title](#)

**Just, D., Garcia, V., Fernandez, L., et al. (2013) Micro-Tom mutants for functional analysis of target genes and discovery of new alleles in tomato. *Plant Biotechnol.*, 30, 225–231**

Google Scholar: [Author Only](#) [Title Only](#) [Author and Title](#)

**Käll L., Canterbury J., Weston J., Noble W.S. and MacCoss M.J. (2007) Semi-supervised learning for peptide identification from shotgun proteomics datasets, *Nature Methods* 4:923 – 925**

**Kasahara, M., Swartz, T.E., Olney, M.A., Onodera, A., Mochizuki, N., Fukuzawa, H., Asamizu, E., Tabata, S., Kanegae, H., Takano, M., Christie, J.M., Nagatani, A., Briggs, W.R. (2002) Photochemical properties of the flavin mononucleotide-binding domains of the phototropins from *Arabidopsis*, rice, and *Chlamydomonas reinhardtii*. *Plant Physiology*, 129, 762-773. DOI: 10.1104/pp.002410**

Google Scholar: [Author Only](#) [Title Only](#) [Author and Title](#)

**Kasahara, M., Torii, M., Fujita, A. and Tainaka, K. (2010) FMN Binding and Photochemical Properties of Plant Putative Photoreceptors Containing Two LOV Domains, LOV/LOV Proteins. *J. Biol. Chem.*, 285, 34765–34772**



Google Scholar: [Author Only](#) [Title Only](#) [Author and Title](#)

**Kobayashi, M., Nagasaki, H., Garcia, V., et al. (2014) Genome-Wide Analysis of Intraspecific DNA Polymorphism in 'Micro-Tom', a Model Cultivar of Tomato (*Solanum lycopersicum*). *Plant Cell Physiol.*, 55, 445–454**

Google Scholar: [Author Only](#) [Title Only](#) [Author and Title](#)

**Krauss, U., Minh, B.Q., Losi, A., Gartner, W., Eggert, T., von Haeseler, A., Jaeger, K.E. (2009) Distribution and Phylogeny of Light-Oxygen-Voltage-Blue-Light-Signaling Proteins in the Three Kingdoms of Life. *Journal of Bacteriology*, 23, 7234-7242. DOI: 10.1128/JB.00923-09**

Google Scholar: [Author Only](#) [Title Only](#) [Author and Title](#)

**Laemmli, U.K. (1970), Cleavage of structural proteins during the assembly of the head of bacteriophage T4 *Nature*, 227 pp. 680-685**

Google Scholar: [Author Only](#) [Title Only](#) [Author and Title](#)

**Laing, W.A, Martinez-Sanchez, M., Wright, M.A, et al. (2015) An upstream open reading frame is essential for feedback regulation of ascorbate biosynthesis in *Arabidopsis*. *Plant Cell*, 27, 772–786**

Google Scholar: [Author Only](#) [Title Only](#) [Author and Title](#)

**Lei, Y., Lu, L., Liu, H.-Y., Li, S., Xing, F. and Chen, L.-L. (2014) CRISPR-P: A Web Tool for Synthetic Single-Guide RNA Design of CRISPR-System in Plants. *Mol. Plant*, 7, 1494–1496**

Google Scholar: [Author Only](#) [Title Only](#) [Author and Title](#)

**Li, H., Handsaker, B., Wysoker, A., Fennell, T., Ruan, J., Homer, N., Marth, G., Abecasis, G. and Durbin, R. (2009) The Sequence Alignment/Map format and SAMtools. *Bioinformatics*, 25, 2078–2079**

Google Scholar: [Author Only](#) [Title Only](#) [Author and Title](#)

**Li, J., Liang, D., Li, M. and Ma, F. (2013) Light and abiotic stresses regulate the expression of GDP-L-galactose phosphorylase and levels of ascorbic acid in two kiwifruit genotypes via light-responsive and stress-inducible cis-elements in their promoters. *Planta*, 238, 535–547.**

Google Scholar: [Author Only](#) [Title Only](#) [Author and Title](#)

**Li, Y., Zhang, Y., Li, M., Luo, Q., Mallano, A.I., Jing, Y., Zhang, Y., Zhao, L. and Li, W. (2018) GmPLP1, a PAS/LOV protein, functions as a possible new type of blue light photoreceptor in soybean. *Gene*, 645, 170–178**

Google Scholar: [Author Only](#) [Title Only](#) [Author and Title](#)

**Linster, C.L. and Clarke, S.G. (2008) L-Ascorbate biosynthesis in higher plants: the role of VTC2. *Trends Plant Sci.*, 13, 567–73**

Google Scholar: [Author Only](#) [Title Only](#) [Author and Title](#)

**Linster, C.L., Gomez, T.A, Christensen, K.C., Adler, L.N., Young, B.D., Brenner, C. and Clarke, S.G. (2007) *Arabidopsis* VTC2 Encodes a GDP-L-Galactose Phosphorylase, the Last Unknown Enzyme in the Smirnoff-Wheeler Pathway to Ascorbic Acid in Plants. *J. Biol. Chem.*, 282, 18879–18885**

Google Scholar: [Author Only](#) [Title Only](#) [Author and Title](#)

**Linster, C.L., Adler, L.N., Webb, K., Christensen, K.C., Brenner, C. and Clarke, S.G. (2008) A second GDP-L-galactose phosphorylase in *Arabidopsis* en route to vitamin C. Covalent intermediate and substrate requirements for the conserved reaction. *Journal of Biological Chemistry*, 283, 18483-18492.**

Google Scholar: [Author Only](#) [Title Only](#) [Author and Title](#)

**Losi, A and Gartner, W. (2012) The Evolution of Flavin-Binding Photoreceptors: An Ancient Chromophore Serving Trendy Blue-Light Sensors. *Annual Review of Plant Biology*, 63, 49-72. DOI: 10.1146/annurev-arplant-042811-105538**

Google Scholar: [Author Only](#) [Title Only](#) [Author and Title](#)

**Mach, J. (2013) COP9 Signalosome-Regulated Proteolysis: Turning Off Ascorbic Acid Synthesis When the Lights Go Out. *Plant Cell*, 25, 359–359**

Google Scholar: [Author Only](#) [Title Only](#) [Author and Title](#)

**Massot, C., Stevens, R., Génard, M., Longuenesse, J.-J. and Gautier, H. (2012) Light affects ascorbate content and ascorbate-related gene expression in tomato leaves more than in fruits. *Planta*, 235, 153–163**

Google Scholar: [Author Only](#) [Title Only](#) [Author and Title](#)

**Möglich, A, Yang, X.J., Ayers, R.A and Moffat, K. (2010) Structure and Function of Plant Photoreceptors. *Annual Review of Plant Biology*, 61, 21-47. DOI: 10.1146/annurev-arplant-042809-112259**

Google Scholar: [Author Only](#) [Title Only](#) [Author and Title](#)

**Müller-Moulé, P. (2008). An expression analysis of the ascorbate biosynthesis enzyme VTC2. *Plant Mol. Biol.*, 68, 31–41.**

Google Scholar: [Author Only](#) [Title Only](#) [Author and Title](#)

**Müller K, Engesser R, Schulz S, Steinberg T, Tomakidi P, Weber CC, et al. (2013) Multi-chromatic control of mammalian gene expression and signaling. *Nucleic Acids Res.*; 41: e124. doi: 10.1093/nar/ gkt340 PMID: 23625964**

Google Scholar: [Author Only](#) [Title Only](#) [Author and Title](#)

Müller, K., Siegel, D., Rodriguez Jahnke, F., Gerrer, K., Wend, S., Decker, E.L., Reski, R., Weber, W. and Zurbriggen, M.D. (2014) A red light-controlled synthetic gene expression switch for plant systems. *Mol. Biosyst.*, 10, 1679–88

Google Scholar: [Author Only](#) [Title Only](#) [Author and Title](#)

Nosaki S, Kaneko MK, Tsuruta F, Yoshida H, Kato Y, Miura K. (2021) Prevention of necrosis caused by transient expression in *Nicotiana benthamiana* by application of ascorbic acid. *Plant Physiol* 186: 832–835

Google Scholar: [Author Only](#) [Title Only](#) [Author and Title](#)

Ogura, Y., Komatsu, A., Zkihara, K., Nanjo, T., Tokutomi, S., Wada, M. and Kiyosue, T. (2008) Blue light diminishes interaction of PAS/LOV proteins, putative blue light receptors in *Arabidopsis thaliana*, with their interacting partners. *J. Plant Res.*, 121, 97–105

Google Scholar: [Author Only](#) [Title Only](#) [Author and Title](#)

Rothan, C., Just, D., Fernandez, L., Atienza, I., Ballias, P. and Lemaire-Chamley, M. (2016) Culture of the Tomato Micro-Tom Cultivar in Greenhouse. In J. R. Botella and M. A. Botella, eds. *Plant Signal Transduction: Methods and Protocols*. New York, NY: Springer New York, pp. 57–64

Google Scholar: [Author Only](#) [Title Only](#) [Author and Title](#)

Smith, S.M. and Maughan, P.J. (2015) SNP genotyping using KASPar assays. *Methods Mol. Biol.*, 1245, 243-256

Google Scholar: [Author Only](#) [Title Only](#) [Author and Title](#)

Szymanski, J. Levin, Y., Savidor, A., Breitel, D., Chappell-Maor, L., Heinig, U., Töpfer, N. and Aharoni, A (2017) Label-free deep shotgun proteomics reveals protein dynamics during tomato fruit tissues development. *The Plant Journal*, 90, 396-417. DOI: 10.1111/tpj.13490

Google Scholar: [Author Only](#) [Title Only](#) [Author and Title](#)

Tabata, K., Takaoka, T. and Esaka, M. (2002) Gene expression of ascorbic acid-related enzymes in tobacco. *Phytochemistry*, 61, 631–635.

Google Scholar: [Author Only](#) [Title Only](#) [Author and Title](#)

Truffault, V. Fry, S.C. Stevens, R.G., Gautier, H. (2017) Ascorbate degradation in tomato leads to accumulation of oxalate, threonate and oxalyl threonate. *The Plant Journal*, 89, 996-1008. DOI: 10.1111/tpj.13439

Google Scholar: [Author Only](#) [Title Only](#) [Author and Title](#)

Uhrig, R.G., Echevarria-Zomeño, S., Schlapfer, P., Grossmann, J., Roschitzki, B., Koerber, N. et al. (2021) Diurnal dynamics of the arabidopsis rosette proteome and phosphoproteome. *Plant, Cell & Environment*, 44, 821– 841

Google Scholar: [Author Only](#) [Title Only](#) [Author and Title](#)

Walter, M., Chaban, C., Schütze, K., et al. (2004) Visualization of protein interactions in living plant cells using bimolecular fluorescence complementation. *Plant J.*, 40, 428–438

Google Scholar: [Author Only](#) [Title Only](#) [Author and Title](#)

Wang, J., Yu, Y., Zhang, Z., Quan, R., Zhang, H., Ma, L., Deng, X.W. and Huang, R. (2013) *Arabidopsis* CSN5B Interacts with VTC1 and Modulates Ascorbic Acid Synthesis. *Plant Cell*, 25, 625–636

Google Scholar: [Author Only](#) [Title Only](#) [Author and Title](#)

Wheeler, G., Ishikawa, T., Pornsaksit, V. and Smirnov, N. (2015) Evolution of alternative biosynthetic pathways for vitamin C following plastid acquisition in photosynthetic eukaryotes. *Elife*, 2015, 1–25.

Google Scholar: [Author Only](#) [Title Only](#) [Author and Title](#)

Wheeler, G.L., Jones, M. and Smirnov, N. (1998) vitamin C in higher plants. *Nature*, 393, 365–369.

Google Scholar: [Author Only](#) [Title Only](#) [Author and Title](#)

Yamamoto T, Hoshikawa K, Ezura K, Okazawa R, Fujita S, Takaoka M, Mason HS, Ezura H, Miura K. (2018) Improvement of the transient expression system for production of recombinant proteins in plants. *Sci Rep* 8: 4755

Google Scholar: [Author Only](#) [Title Only](#) [Author and Title](#)

Yasuhara, M., Mitsui, S., Hirano, H., Takanabe, R., Tokioka, Y., Ihara, N., Komatsu, A., Seki, M., Shinozaki, K. and Kiyosue, T. (2004) Identification of ASK and clock-associated proteins as molecular partners of LKP2 (LOV kelch protein 2) in *Arabidopsis*. *Journal of Experimental Botany*, 55, 2015–2027. DOI: 10.1093/jxb/erh226

Google Scholar: [Author Only](#) [Title Only](#) [Author and Title](#)

Yoshimura, K., Nakane, T., Kume, S., Shiomi, Y., Maruta, T., Ishikawa, T. and Shigeoka, S. (2014) Transient expression analysis revealed the importance of VTC2 expression level in light/dark regulation of ascorbate biosynthesis in *Arabidopsis*. *Bioscience, Biotechnology and Biochemistry*, 78, 60-66. DOI: 10.1080/09168451.2014.877831

Google Scholar: [Author Only](#) [Title Only](#) [Author and Title](#)

Zhang, W., Lorence, A., Gruszewski, H.A., Chevone, B.I. and Nessler, C.L. (2009) AMR1, an *Arabidopsis* Gene That Coordinately and Negatively Regulates the Mannose/L-Galactose Ascorbic Acid Biosynthetic Pathway. *Plant Physiol.*, 150, 942–950

Google Scholar: [Author Only](#) [Title Only](#) [Author and Title](#)

**Zhang, Z and Huang, R. (2010) Enhanced tolerance to freezing in tobacco and tomato overexpressing transcription factor TERF2/LeERF2 is modulated by ethylene biosynthesis. Plant Mol. Biol., 73, 241–9**

Google Scholar: [Author Only](#) [Title Only](#) [Author and Title](#)

**Zhang, Z, Wang, J., Zhang, R. and Huang, R. (2012) The ethylene response factor AtERF98 enhances tolerance to salt through the transcriptional activation of ascorbic acid synthesis in Arabidopsis. Plant J., 71, 273–287.**

Google Scholar: [Author Only](#) [Title Only](#) [Author and Title](#)

**Zikihara K, Iwata T, Matsuoka D, Kandori H, Todo T, Tokutomi S (2006) Photoreaction cycle of the Light, Oxygen, and Voltage domain in FKF1 determined by low-temperature absorption spectroscopy. Biochemistry 45:10828–10837**

Google Scholar: [Author Only](#) [Title Only](#) [Author and Title](#)
